# Supplementary material for: Palladium-catalyzed synthesis of [60]fullerene-fused benzofurans via heteroannulation of phenols
Source: Royal Society of Chemistry journal article supplement (doi:10.1039/c6cc09080j), 2017-01-01
Supplement: c6cc09080j1.pdf [file c6cc09080j1.pdf]

# Palladium-catalyzed synthesis of [60]fullerene-fused benzofurans via heteroannulation of phenols

Fei Li,<sup>ab</sup> Jun-Jie Wang<sup>a</sup> and Guan-Wu Wang<sup>\*,ac</sup>

<sup>a</sup>*CAS Key Laboratory of Soft Matter Chemistry, Collaborative Innovation Center of Chemistry for Energy Materials (iChEM), Hefei National Laboratory for Physical Sciences at Microscale, and Department of Chemistry, University of Science and Technology of China, Hefei, Anhui 230026, P. R. China*

<sup>b</sup>*Department of Chemistry, Anhui University, Hefei, Anhui 230039, P. R. China*

<sup>c</sup>*State Key Laboratory of Applied Organic Chemistry, Lanzhou University, Lanzhou, Gansu 730000, P. R. China*

[gwang@ustc.edu.cn](mailto:gwang@ustc.edu.cn)

## Table of Contents

|                                                                                                  |        |
|--------------------------------------------------------------------------------------------------|--------|
| Synthesis and spectral data of products <b>2a–i</b> and <b>3h</b>                                | S2-S8  |
| <sup>1</sup> H NMR, <sup>13</sup> C NMR and UV-vis spectra of products <b>2a–i</b> and <b>3h</b> | S9-S34 |
| CV of <b>2h</b>                                                                                  | S34    |
| Raman spectrum of <b>2a</b>                                                                      | S35    |
| XPS spectrum and peak table of <b>2a</b>                                                         | S35    |

### Synthesis and spectral data of product 2a

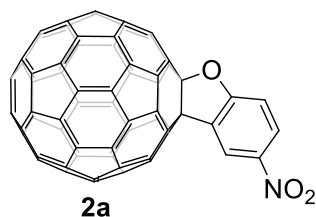

C<sub>60</sub> (36.2 mg, 0.05 mmol), 4-nitrophenol (35.1 mg, 0.25 mmol), K<sub>2</sub>S<sub>2</sub>O<sub>8</sub> (67.5 mg, 0.25 mmol), NaOAc (12.0 mg, 0.15 mmol), 1,10-phenanthroline (3.8 mg, 0.02 mmol), and Pd(OAc)<sub>2</sub> (1.1 mg, 0.005 mmol) were dissolved in *o*-dichlorobenzene (3 mL). The reaction mixture was stirred at 140 °C for 10 h and then was filtered through a silica gel plug in order to remove the insoluble material. After evaporation in vacuo, the residue was separated by a silica gel column with carbon disulfide as the eluent to give unreacted C<sub>60</sub> (3.1 mg, 9%), subsequently with carbon disulfide/dichloromethane (5:1 v/v) to afford **2a** (27.3 mg, 63%). <sup>1</sup>H NMR (400 MHz, CS<sub>2</sub>/DMSO-*d*<sub>6</sub>) δ 8.77 (d, *J* = 2.4 Hz, 1H), 8.46 (dd, *J* = 8.8, 2.4 Hz, 1H), 7.55 (d, *J* = 8.8 Hz, 1H); <sup>13</sup>C NMR (100 MHz, CS<sub>2</sub>/DMSO-*d*<sub>6</sub> with Cr(acac)<sub>3</sub> as relaxation reagent) (all 2C unless indicated) δ 161.76 (1C, aryl C), 148.62, 147.30 (1C), 146.55 (1C), 145.52, 145.47, 145.36, 145.23, 145.15, 144.66, 144.45, 144.36, 144.25, 144.06, 143.72, 143.54, 143.40, 142.94, 142.62 (1C, aryl C), 142.05, 141.93, 141.88, 141.64, 141.45, 141.42, 141.33, 141.04, 140.71, 140.05, 139.02, 136.73, 134.99, 127.61 (1C, aryl C), 126.79 (1C, aryl C), 121.42 (1C, aryl C), 111.38 (1C, aryl C), 103.98 (1C, sp<sup>3</sup>-C of C<sub>60</sub>), 68.95 (1C, sp<sup>3</sup>-C of C<sub>60</sub>); FT-IR (KBr) ν 1591, 1515, 1470, 1334, 1269, 1187, 1126, 1070, 951, 918, 825, 743, 701, 564, 528 cm<sup>-1</sup>; UV-vis (CHCl<sub>3</sub>) λ<sub>max</sub> (log ε) 256 (4.59), 318 (4.27), 430 (2.85) nm; HRMS (MALDI-TOF-MS, negative mode) *m/z* calcd for C<sub>66</sub>H<sub>3</sub>NO<sub>3</sub> [M]<sup>-</sup> 857.0113, found 857.0126.

### Synthesis and spectral data of product 2b

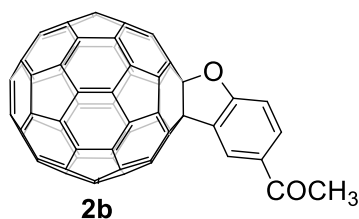

C<sub>60</sub> (36.0 mg, 0.05 mmol), 4-hydroxyacetophenone (34.5 mg, 0.25 mmol), K<sub>2</sub>S<sub>2</sub>O<sub>8</sub> (67.9 mg, 0.25 mmol), NaOAc (12.7 mg, 0.15 mmol), 1,10-phenanthroline (4.0 mg, 0.02 mmol), and Pd(OAc)<sub>2</sub> (1.1 mg, 0.005 mmol) were dissolved in *o*-dichlorobenzene (3 mL). The reaction mixture was stirred at 140 °C for 12 h and then was filtered through a silica gel plug in order to remove the insoluble material. After evaporation in vacuo, the residue was separated a silica gel column with carbon disulfide as the eluent to give unreacted C<sub>60</sub> (5.3 mg, 15%), subsequently with carbon disulfide/dichloromethane (1:1 v/v) to afford **2b** (27.1 mg, 63%). <sup>1</sup>H NMR (400 MHz, CS<sub>2</sub>/DMSO-*d*<sub>6</sub>) δ 8.47 (d, *J* = 1.8 Hz, 1H), 8.15 (dd, *J* = 8.6, 1.8 Hz, 1H), 7.43 (d, *J* =

8.6 Hz, 1H), 2.60 (s, 3H);  $^{13}\text{C}$  NMR (100 MHz,  $\text{CS}_2/\text{DMSO}-d_6$  with  $\text{Cr}(\text{acac})_3$  as relaxation reagent) (all 2C unless indicated)  $\delta$  191.95 (1C, C=O), 160.20 (1C, aryl C), 149.28, 147.07 (1C), 146.32 (1C), 145.28, 145.21, 145.12, 145.00, 144.92, 144.35, 144.34, 144.14 (4C), 144.01, 143.74, 143.58, 143.38, 143.24, 141.85, 141.70, 141.65, 141.58, 141.25, 141.21, 141.13, 140.82, 140.61, 139.80, 138.77, 136.51, 134.64, 131.80 (1C, aryl C), 131.40 (1C, aryl C), 126.39 (1C, aryl C), 125.46 (1C, aryl C), 110.79 (1C, aryl C), 102.87 (1C,  $\text{sp}^3\text{-C}$  of  $\text{C}_{60}$ ), 69.34 (1C,  $\text{sp}^3\text{-C}$  of  $\text{C}_{60}$ ), 25.45 (1C,  $\text{CH}_3$ ); FT-IR (KBr)  $\nu$  1677, 1593, 1510, 1482, 1424, 1351, 1264, 1184, 971, 918, 815, 769, 568, 528  $\text{cm}^{-1}$ ; UV-vis ( $\text{CHCl}_3$ )  $\lambda_{\text{max}}$  (log  $\epsilon$ ) 257 (4.46), 317 (4.00), 428 (2.30) nm; HRMS (MALDI-TOF-MS, negative mode),  $m/z$  calcd for  $\text{C}_{68}\text{H}_6\text{O}_2$   $[\text{M}]^-$  854.0368, found 854.0385.

### Synthesis and spectral data of product 2c

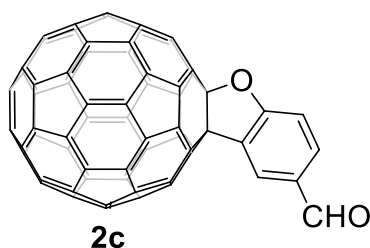

$\text{C}_{60}$  (36.0 mg, 0.05 mmol), 4-hydroxybenzaldehyde (30.4 mg, 0.25 mmol),  $\text{K}_2\text{S}_2\text{O}_8$  (69.4 mg, 0.25 mmol),  $\text{NaOAc}$  (12.5 mg, 0.15 mmol), 1,10-phenanthroline (4.1 mg, 0.02 mmol), and  $\text{Pd}(\text{OAc})_2$  (1.0 mg, 0.005 mmol) were dissolved in *o*-dichlorobenzene (3 mL). The reaction mixture was stirred at 140 °C for 10 h and then was filtered through a silica gel plug in order to remove the insoluble material. After evaporation in vacuo, the residue was separated by a silica gel column with carbon disulfide as the eluent to give unreacted  $\text{C}_{60}$  (12.3 mg, 34%), subsequently with carbon disulfide/dichloromethane (5:1 v/v) to afford **2c** (24.5 mg, 58%).  $^1\text{H}$  NMR (400 MHz,  $\text{CS}_2/\text{DMSO}-d_6$ )  $\delta$  9.99 (s, 1H), 8.44 (d,  $J$  = 1.6 Hz, 1H), 8.07 (dd,  $J$  = 8.3, 1.6 Hz, 1H), 7.52 (d,  $J$  = 8.3 Hz, 1H);  $^{13}\text{C}$  NMR (100 MHz,  $\text{CS}_2/\text{DMSO}-d_6$  with  $\text{Cr}(\text{acac})_3$  as relaxation reagent) (all 2C unless indicated)  $\delta$  186.99 (1C, C=O), 161.43 (1C, aryl C), 149.22, 147.21 (1C), 146.46 (1C), 145.43, 145.37, 145.26, 145.15, 145.06, 144.50, 144.46, 144.28, 144.16, 144.13, 143.83, 143.51, 143.45, 143.37, 141.99, 141.85, 141.80, 141.69, 141.39, 141.36, 141.27, 140.96, 140.72, 139.99, 138.92, 136.67, 134.81, 133.10 (1C, aryl C), 131.70 (1C, aryl C), 127.31 (1C, aryl C), 126.27 (1C, aryl C), 111.53 (1C, aryl C), 103.21 (1C,  $\text{sp}^3\text{-C}$  of  $\text{C}_{60}$ ), 69.17 (1C,  $\text{sp}^3\text{-C}$  of  $\text{C}_{60}$ ); FT-IR (KBr)  $\nu$  1691, 1594, 1482, 1433, 1267, 1180, 1143, 923, 817, 530  $\text{cm}^{-1}$ ; UV-vis ( $\text{CHCl}_3$ )  $\lambda_{\text{max}}$  (log  $\epsilon$ ) 256 (4.55), 315 (4.13), 428 (2.60) nm; HRMS (MALDI-TOF-MS, negative mode)  $m/z$  calcd for  $\text{C}_{67}\text{H}_4\text{O}_2$   $[\text{M}]^-$  840.0211, found 840.0225.

### Synthesis and spectral data of product 2d

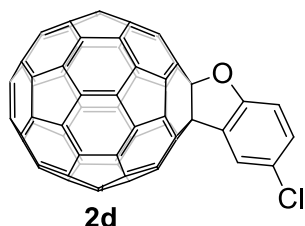

C<sub>60</sub> (36.4 mg, 0.05 mmol), *p*-chlorophenol (32.7 mg, 0.25 mmol), K<sub>2</sub>S<sub>2</sub>O<sub>8</sub> (68.9 mg, 0.25 mmol), NaOAc (12.0 mg, 0.15 mmol), 1,10-phenanthroline (3.9 mg, 0.02 mmol), and Pd(OAc)<sub>2</sub> (1.1 mg, 0.005 mmol) were dissolved in *o*-dichlorobenzene (3 mL). The reaction mixture was stirred at 140 °C for 12 h and then was filtered through a silica gel plug in order to remove the insoluble material. After evaporation in vacuo, the residue was dissolved in toluene and subjected to semi-preparative HPLC equipped with a Buckyprep column (eluent: toluene) to give unreacted C<sub>60</sub> (2.7 mg, 7%) and **2d** (24.9 mg, 58%). <sup>1</sup>H NMR (400 MHz, CS<sub>2</sub>/DMSO-*d*<sub>6</sub>) δ 7.85 (d, *J* = 2.0 Hz, 1H), 7.46 (dd, *J* = 8.7, 2.0 Hz, 1H), 7.32 (d, *J* = 8.7 Hz, 1H); <sup>13</sup>C NMR (100 MHz, CS<sub>2</sub>/DMSO-*d*<sub>6</sub> with Cr(acac)<sub>3</sub> as relaxation reagent) (all 2C unless indicated) δ 155.21 (1C, aryl C), 149.00, 147.14 (1C), 146.40 (1C), 145.32, 145.26, 145.19, 145.07, 144.97, 144.43, 144.41, 144.19, 144.10, 144.00, 143.96, 143.83, 143.42, 143.35, 141.92, 141.75, 141.72, 141.62, 141.32, 141.29, 141.17, 140.83, 140.74, 139.88, 138.84, 136.43, 134.88, 129.92 (1C, aryl C), 127.32 (1C, aryl C), 126.53 (1C, aryl C), 124.89 (1C, aryl C), 112.19 (1C, aryl C), 102.40 (1C, sp<sup>3</sup>-C of C<sub>60</sub>), 69.72 (1C, sp<sup>3</sup>-C of C<sub>60</sub>); FT-IR (KBr) ν 1592, 1495, 1291, 1193, 1155, 1085, 1027, 987, 957, 820, 526 cm<sup>-1</sup>; UV-vis (CHCl<sub>3</sub>) λ<sub>max</sub> (log ε) 258 (4.55), 328 (4.05), 428 (2.92) nm; HRMS (MALDI-TOF-MS, negative mode) *m/z* calcd for C<sub>66</sub>H<sub>3</sub>ClO [M]<sup>-</sup> 845.9872, found 845.9885.

### Synthesis and spectral data of product 2e

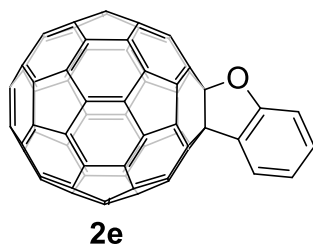

C<sub>60</sub> (36.3 mg, 0.05 mmol), phenol (24.3 mg, 0.25 mmol), K<sub>2</sub>S<sub>2</sub>O<sub>8</sub> (68.2 mg, 0.25 mmol), NaOAc (12.0 mg, 0.15 mmol), 1,10-phenanthroline (4.1 mg, 0.02 mmol), and Pd(OAc)<sub>2</sub> (1.2 mg, 0.005 mmol) were dissolved in *o*-dichlorobenzene (3 mL). The reaction mixture was stirred at 140 °C for 12 h and then was filtered through a silica gel plug in order to remove the insoluble material. After evaporation in vacuo, the residue was dissolved in toluene and subjected to semi-preparative HPLC equipped with a Buckyprep column (eluent: toluene) to give unreacted C<sub>60</sub> (11.4 mg, 31%) and **2e** (18.5 mg, 43%). <sup>1</sup>H NMR (400 MHz, CS<sub>2</sub>/DMSO-*d*<sub>6</sub>) δ 7.85 (d, *J* = 7.6 Hz, 1H), 7.50 (t, *J* = 7.2 Hz, 1H), 7.34 (d, *J* = 8.0 Hz, 1H), 7.23 (t, *J* = 7.6 Hz, 1H); <sup>13</sup>C NMR (100 MHz, CS<sub>2</sub>/DMSO-*d*<sub>6</sub> with Cr(acac)<sub>3</sub> as relaxation reagent) (all 2C unless

indicated)  $\delta$  156.55 (1C, aryl C), 149.74, 147.13 (1C), 146.40 (1C), 145.32, 145.24, 145.18, 145.07, 144.96, 144.53 (4C), 144.31, 144.23, 144.20, 144.08, 144.04, 143.47, 143.40, 142.08, 141.95, 141.76 (4C), 141.72, 141.35, 141.32, 141.19, 140.83 (4C), 139.85, 138.84, 136.49, 134.78, 129.97 (1C, aryl C), 125.28 (1C, aryl C), 124.81 (1C, aryl C), 121.79 (1C, aryl C), 111.23 (1C, aryl C), 101.74 (1C,  $\text{sp}^3\text{-C}$  of  $\text{C}_{60}$ ), 70.19 (1C,  $\text{sp}^3\text{-C}$  of  $\text{C}_{60}$ ); FT-IR (KBr)  $\nu$  1463, 1424, 1210, 1106, 1077, 948, 928, 861, 762, 650, 564, 526  $\text{cm}^{-1}$ ; UV-vis ( $\text{CHCl}_3$ )  $\lambda_{\text{max}}$  ( $\log \epsilon$ ) 255 (4.60), 315 (4.16), 426 (3.18) nm; HRMS (MALDI-TOF-MS, negative mode)  $m/z$  calcd for  $\text{C}_{66}\text{H}_4\text{O}$   $[\text{M}]^-$  862.0262, found 862.0276.

### Synthesis and spectral data of product 2f

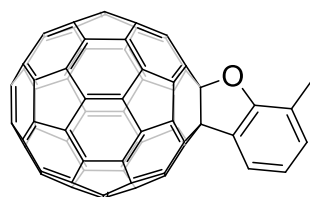

**2f**

$\text{C}_{60}$  (35.8 mg, 0.05 mmol), *o*-cresol (26  $\mu\text{L}$ , 0.25 mmol),  $\text{K}_2\text{S}_2\text{O}_8$  (69.0 mg, 0.25 mmol), NaOAc (12.3 mg, 0.15 mmol), 1,10-phenanthroline (4.3 mg, 0.02 mmol), and  $\text{Pd}(\text{OAc})_2$  (1.2 mg, 0.005 mmol) were dissolved in *o*-dichlorobenzene (3 mL). The reaction mixture was stirred at 140  $^\circ\text{C}$  for 12 h and then was filtered through a silica gel plug in order to remove the insoluble material. After evaporation in vacuo, the residue was dissolved in toluene and subjected to semi-preparative HPLC equipped with a Buckyprep column (eluent: toluene) to give unreacted  $\text{C}_{60}$  (5.8 mg, 16%) and **2f** (22.9 mg, 56%).  $^1\text{H}$  NMR (400 MHz,  $\text{CS}_2/\text{DMSO-}d_6$ )  $\delta$  7.67-7.64 (m, 1H), 7.30-7.26 (m, 1H), 7.11 (t,  $J = 7.4$  Hz, 1H), 2.61 (s, 3H);  $^{13}\text{C}$  NMR (100 MHz,  $\text{CS}_2/\text{DMSO-}d_6$  with  $\text{Cr}(\text{acac})_3$  as relaxation reagent) (all 2C unless indicated)  $\delta$  154.83 (1C, aryl C), 149.85, 147.12 (1C), 146.37 (1C), 145.30, 145.21, 145.14, 145.04, 144.94, 144.74, 144.51, 144.27, 144.26, 144.18, 144.06 (4C), 143.47, 143.39, 141.94, 141.77, 141.73, 141.70, 141.34, 141.30, 141.17, 140.84, 140.81, 139.85, 138.80, 136.47, 134.69, 130.97 (1C, aryl C), 124.41 (1C, aryl C), 122.20 (1C, aryl C), 121.93 (1C, aryl C), 121.30 (1C, aryl C), 101.44 (1C,  $\text{sp}^3\text{-C}$  of  $\text{C}_{60}$ ), 70.55 (1C,  $\text{sp}^3\text{-C}$  of  $\text{C}_{60}$ ), 15.31 (1C,  $\text{CH}_3$ ); FT-IR (KBr)  $\nu$  1558, 1506, 1463, 1262, 1210, 1106, 948, 927, 861, 760, 648, 594, 562, 526  $\text{cm}^{-1}$ ; UV-vis ( $\text{CHCl}_3$ )  $\lambda_{\text{max}}$  ( $\log \epsilon$ ) 255 (4.59), 315 (4.12), 426 (2.94) nm; HRMS (MALDI-TOF-MS, negative mode)  $m/z$  calcd for  $\text{C}_{67}\text{H}_6\text{O}$   $[\text{M}]^-$  826.0419, found 826.0432.

### Synthesis and spectral data of product 2g

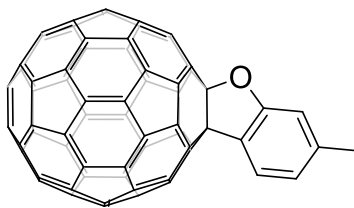

**2g**

C<sub>60</sub> (35.8 mg, 0.05 mmol), *m*-cresol (27  $\mu$ L, 0.25 mmol), K<sub>2</sub>S<sub>2</sub>O<sub>8</sub> (67.6 mg, 0.25 mmol), NaOAc (13.4 mg, 0.15 mmol), 1,10-phenanthroline (4.0 mg, 0.02 mmol), and Pd(OAc)<sub>2</sub> (1.1 mg, 0.005 mmol) were dissolved in *o*-dichlorobenzene (3 mL). The reaction mixture was stirred at 140 °C for 12 h and then was filtered through a silica gel plug in order to remove the insoluble material. After evaporation in vacuo, the residue was dissolved in toluene and subjected to semi-preparative HPLC equipped with a Buckyprep column (eluent: toluene) to give unreacted C<sub>60</sub> (20.4 mg, 57%) and **2g** (13.3 mg, 32%). <sup>1</sup>H NMR (400 MHz, CS<sub>2</sub>/DMSO-*d*<sub>6</sub>)  $\delta$  7.78 (d, *J* = 7.6 Hz, 1H), 7.23 (s, 1H), 7.11 (d, *J* = 7.6 Hz, 1H), 2.66 (s, 3H); <sup>13</sup>C NMR (100 MHz, CS<sub>2</sub>/DMSO-*d*<sub>6</sub> with Cr(acac)<sub>3</sub> as relaxation reagent) (all 2C unless indicated)  $\delta$  156.78 (1C, aryl C), 149.92, 147.11 (1C), 146.37 (1C), 145.29, 145.20, 145.13, 145.04, 144.93, 144.69, 144.52, 144.25, 144.21, 144.17, 144.04, 144.03, 143.46, 143.37, 141.92, 141.79, 141.72, 141.69, 141.32, 141.28, 141.15, 140.80 (4C), 140.06 (1C, aryl C), 139.81, 138.78, 136.47, 134.65, 124.33 (1C, aryl C), 122.61 (1C, aryl C), 122.52 (1C, aryl C), 111.66 (1C, aryl C), 101.97 (1C, sp<sup>3</sup>-C of C<sub>60</sub>), 70.05 (1C, sp<sup>3</sup>-C of C<sub>60</sub>), 21.19 (1C, CH<sub>3</sub>); FT-IR (KBr)  $\nu$  1558, 1506, 1452, 1273, 1139, 1085, 985, 951, 949, 883, 802, 782, 622, 594, 525 cm<sup>-1</sup>; UV-vis (CHCl<sub>3</sub>)  $\lambda_{\text{max}}$  (log  $\epsilon$ ) 255 (4.52), 315 (4.05), 428 (2.80) nm; HRMS (MALDI-TOF-MS, negative mode) *m/z* calcd for C<sub>67</sub>H<sub>6</sub>O [M]<sup>-</sup> 826.0419, found 826.0435.

### Synthesis and spectral data of product 2h

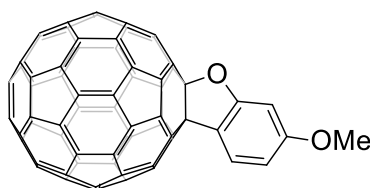

**2h**

C<sub>60</sub> (36.1 mg, 0.05 mmol), 3-methoxyphenol (35  $\mu$ L, 0.25 mmol), K<sub>2</sub>S<sub>2</sub>O<sub>8</sub> (67.4 mg, 0.25 mmol), NaOAc (12.4 mg, 0.15 mmol), 1,10-phenanthroline (4.4 mg, 0.02 mmol) and Pd(OAc)<sub>2</sub> (1.1 mg, 0.005 mmol) were dissolved in *o*-dichlorobenzene (3 mL). The reaction mixture was stirred at 140 °C for 12 h and then was filtered through a silica gel plug in order to remove the insoluble material. After evaporation in vacuo, the residue was separated by a silica gel column with carbon disulfide as the eluent to give unreacted C<sub>60</sub> (5.8 mg, 16%), subsequent elution with carbon disulfide/dichloromethane (5:1 v/v) affording **2h** (21.2 mg, 50%). <sup>1</sup>H NMR (400 MHz, CS<sub>2</sub>/DMSO-*d*<sub>6</sub>)  $\delta$  7.69 (d, *J* = 8.3 Hz, 1H), 6.88 (d, *J* = 2.0 Hz, 1H), 6.74 (dd, *J* = 8.3, 2.0 Hz, 1H), 3.94 (s, 3H); <sup>13</sup>C NMR (100 MHz, CS<sub>2</sub>/DMSO-*d*<sub>6</sub> with Cr(acac)<sub>3</sub> as

relaxation reagent) (all 2C unless indicated)  $\delta$  161.13 (1C, aryl C), 157.83 (1C, aryl C), 149.86, 147.05 (1C), 146.32 (1C), 145.24, 145.14, 145.05, 144.98, 144.87, 144.59, 144.47, 144.17, 144.11, 144.09, 143.96, 143.92, 143.42, 143.31, 141.86, 141.80, 141.66, 141.63, 141.27, 141.23, 141.08, 140.76, 140.71, 139.74, 138.69, 136.54, 134.49, 124.79 (1C, aryl C), 116.98 (1C, aryl C), 108.20 (1C, aryl C), 102.53 (1C, aryl C), 96.85 (1C,  $\text{sp}^3$ -C of  $\text{C}_{60}$ ), 69.67 (1C,  $\text{sp}^3$ -C of  $\text{C}_{60}$ ), 54.79 (1C,  $\text{CH}_3$ ); FT-IR (KBr)  $\nu$  1619, 1589, 1499, 1431, 1287, 1194, 1152, 1084, 1028, 989, 954, 879, 819, 623, 564, 524  $\text{cm}^{-1}$ ; UV-vis ( $\text{CHCl}_3$ )  $\lambda_{\text{max}}$  (log  $\epsilon$ ) 255 (4.56), 315 (4.07), 428 (2.34) nm; HRMS (MALDI-TOF-MS, negative mode)  $m/z$  calcd for  $\text{C}_{67}\text{H}_6\text{O}_2$   $[\text{M}]^-$  842.0368, found 842.0381.

### Synthesis and spectral data of product 2i

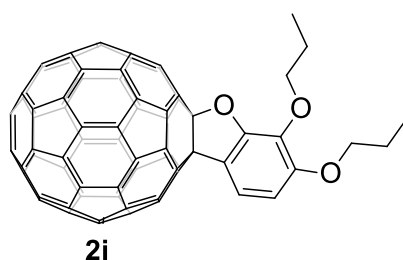

$\text{C}_{60}$  (36.1 mg, 0.05 mmol), 2,3-propoxyphenol (53.6 mg, 0.25 mmol),  $\text{K}_2\text{S}_2\text{O}_8$  (67.6 mg, 0.25 mmol), NaOAc (12.3 mg, 0.15 mmol), 1,10-phenanthroline (4.2 mg, 0.02 mmol) and  $\text{Pd}(\text{OAc})_2$  (1.1 mg, 0.005 mmol) were dissolved in *o*-dichlorobenzene (3 mL). The reaction mixture was stirred at 140 °C for 15 h and then was filtered through a silica gel plug in order to remove the insoluble material. After evaporation in vacuo, the residue was separated by a silica gel column with carbon disulfide as the eluent to give unreacted  $\text{C}_{60}$  (13.3 mg, 37%), subsequently with carbon disulfide/dichloromethane (5:1 v/v) to afford **2i** (21.7 mg, 44%).  $^1\text{H}$  NMR (400 MHz,  $\text{CS}_2/\text{CDCl}_3$ )  $\delta$  7.46 (d,  $J$  = 8.4 Hz, 1H), 6.79 (d,  $J$  = 8.4 Hz, 1H), 4.39 (t,  $J$  = 6.6 Hz, 2H), 4.10 (t,  $J$  = 6.4 Hz, 2H), 1.88-2.03 (m, 4H), 1.18 (t,  $J$  = 7.4 Hz, 3H), 1.15 (t,  $J$  = 7.4 Hz, 3H);  $^{13}\text{C}$  NMR (100 MHz,  $\text{CS}_2/\text{CDCl}_3$  with  $\text{Cr}(\text{acac})_3$  as relaxation reagent) (all 2C unless indicated)  $\delta$  153.97 (1C, aryl C), 151.00, 150.28 (1C, aryl C), 148.26 (1C), 147.51 (1C), 146.42, 146.35, 146.23, 146.15, 146.03, 145.85, 145.64, 145.30, 145.28, 145.23, 145.20, 145.13, 144.56, 144.48, 142.98, 142.89, 142.80, 142.78, 142.44, 142.40, 142.22, 141.88, 141.81, 140.86, 139.79, 137.83, 135.72, 134.29 (1C, aryl C), 120.78 (1C, aryl C), 119.16 (1C, aryl C), 108.46 (1C, aryl C), 103.93 (1C,  $\text{sp}^3$ -C of  $\text{C}_{60}$ ), 75.28 (1C,  $\text{CH}_2$ ), 71.44 (1C,  $\text{CH}_2$ ), 71.01 (1C,  $\text{sp}^3$ -C of  $\text{C}_{60}$ ), 23.78 (1C,  $\text{CH}_2$ ), 23.00 (1C,  $\text{CH}_2$ ), 10.82 (1C,  $\text{CH}_3$ ), 10.74 (1C,  $\text{CH}_3$ ); FT-IR (KBr)  $\nu$  1592, 1496, 1455, 1385, 1325, 1281, 1255, 1233, 1182, 1161, 1108, 1081, 1038, 1023, 964, 948, 920, 848, 779, 639, 576, 526  $\text{cm}^{-1}$ ; UV-vis ( $\text{CHCl}_3$ )  $\lambda_{\text{max}}$  (log  $\epsilon$ ) 255 (4.57), 315 (4.18), 428 (3.08) nm; HRMS (MALDI-TOF-MS, negative mode)  $m/z$  calcd for  $\text{C}_{75}\text{H}_{22}\text{O}_4$   $[\text{M}]^-$  986.1518, found 986.1529.

### Synthesis and spectral data of product 3h

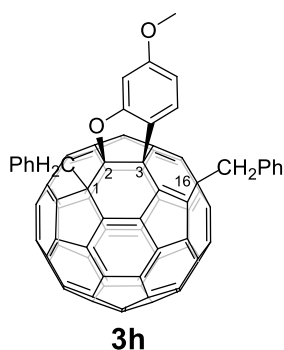

25.3 mg (0.030 mmol) of **2h** was electroreduced at -1.0V vs SCE in 30 mL of ODCB containing 0.1M TBAP under argon atmosphere at room temperature. The electrolysis was terminated when the theoretical number of coulombs required for a full conversion of **2h** to **2h**<sup>2-</sup> was reached. Then, the dianionic **2h** was reacted with benzyl bromide (72.0  $\mu$ L, 0.60 mmol) in the presence of NaH (23.9 mg, 0.60 mmol) at 25 °C for 2 h and the reaction mixture was filtered through a silica gel flash chromatography to remove the electrolyte. After evaporation in vacuo, the residue was separated by a silica gel column with carbon disulfide as the eluent to give unreacted **2h** (7.5 mg, 30%), subsequently with carbon disulfide/dichloromethane (3:1 v/v) to afford **3h** (9.4 mg, 31%). <sup>1</sup>H NMR (400 MHz, CS<sub>2</sub>/acetone-*d*<sub>6</sub>)  $\delta$  7.09 (d, *J* = 8.2 Hz, 1H), 6.65 (dd, *J* = 7.6, 1.6 Hz, 2H), 6.57-6.49 (m, 3H), 6.41-6.33 (m, 5H), 6.11 (dd, *J* = 8.2, 2.4 Hz, 1H), 6.06 (d, *J* = 2.4 Hz, 1H), 3.81 (d, *J* = 12.8 Hz, 1H), 3.59 (d, *J* = 12.8 Hz, 1H), 3.38 (d, *J* = 12.8 Hz, 1H), 3.23 (s, 3H), 3.20 (d, *J* = 12.8 Hz, 1H); <sup>13</sup>C NMR (100 MHz, CS<sub>2</sub>/acetone-*d*<sub>6</sub>, all 1C unless indicated)  $\delta$  162.46, 161.96, 156.21, 154.97, 152.46, 151.11, 150.43, 150.34, 148.99, 148.82, 148.46, 148.42, 148.26, 148.25, 147.47, 147.36, 147.08, 147.02, 146.92, 146.89 (2C), 146.77, 146.54, 146.30, 146.11, 146.08, 145.77, 145.67, 145.64 (2C), 145.17, 145.12, 144.78 (3C), 144.71, 144.66, 144.63, 144.23, 143.85, 143.69, 143.61, 143.41, 142.95, 142.59, 142.50, 141.65, 141.53, 141.43, 141.17, 141.12, 140.01, 138.97, 138.91, 138.74, 137.80, 136.50, 135.75, 134.51, 133.73, 132.00 (2C), 130.86 (2C), 128.75 (2C), 128.33 (2C), 127.80, 127.39, 125.47, 120.86, 109.21, 102.86 (sp<sup>3</sup>-C of C<sub>60</sub>), 97.46, 64.92 (sp<sup>3</sup>-C of C<sub>60</sub>), 62.89 (sp<sup>3</sup>-C of C<sub>60</sub>), 59.19 (sp<sup>3</sup>-C of C<sub>60</sub>), 55.71, 50.24, 46.24; FT-IR (KBr)  $\nu$  2922, 2850, 1624, 1498, 1444, 1157, 1025, 947, 700, 530 cm<sup>-1</sup>; UV-vis (CHCl<sub>3</sub>)  $\lambda_{\text{max}}$  (log  $\epsilon$ ) 252 (4.93), 315 (4.52), 403.5 (3.87), 703.5 (2.30) nm; HRMS (MALDI-TOF-MS, negative mode) *m/z* calcd for C<sub>81</sub>H<sub>20</sub>O<sub>2</sub> [M]<sup>-</sup> 1024.1463, found 1024.1472.

<sup>1</sup>H NMR (400 MHz, CS<sub>2</sub>/DMSO-*d*<sub>6</sub>) of compound 2a

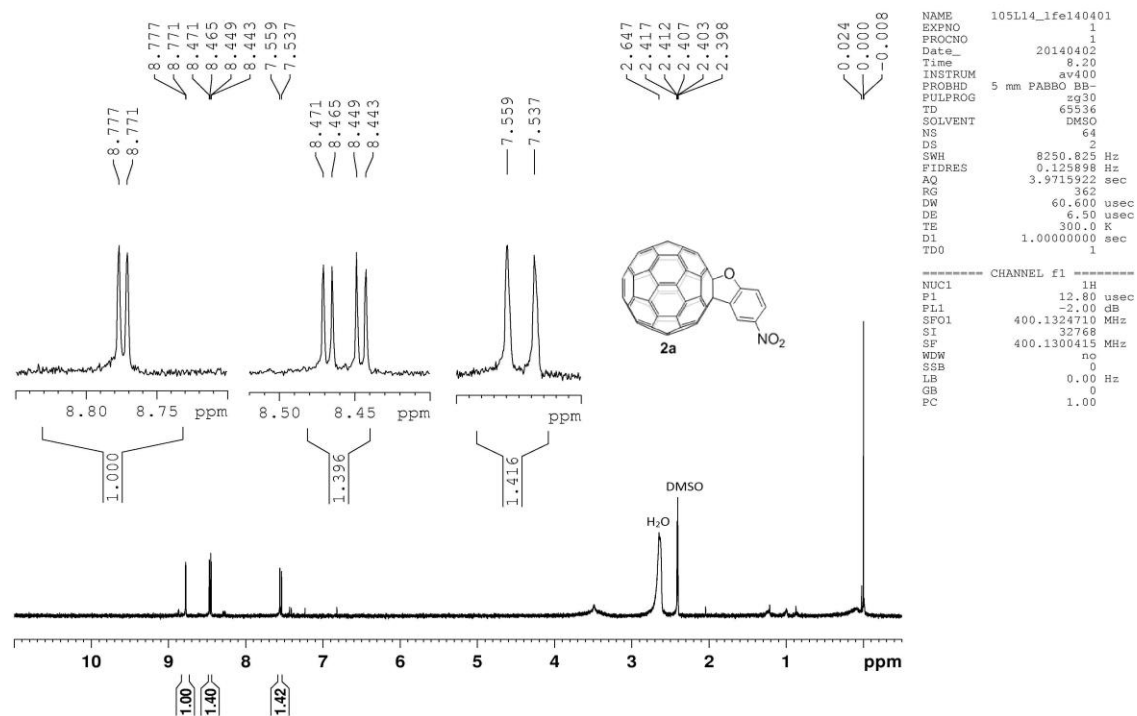

<sup>13</sup>C NMR (100 MHz, CS<sub>2</sub>/DMSO-*d*<sub>6</sub>) of compound 2a

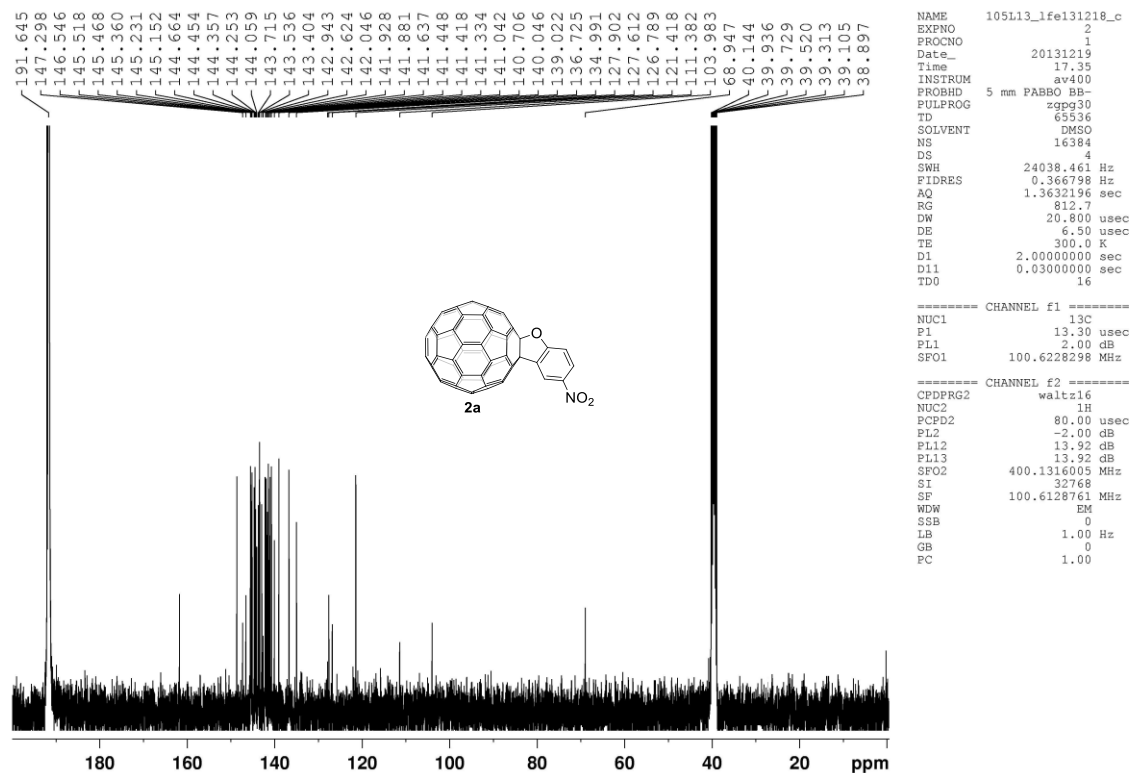

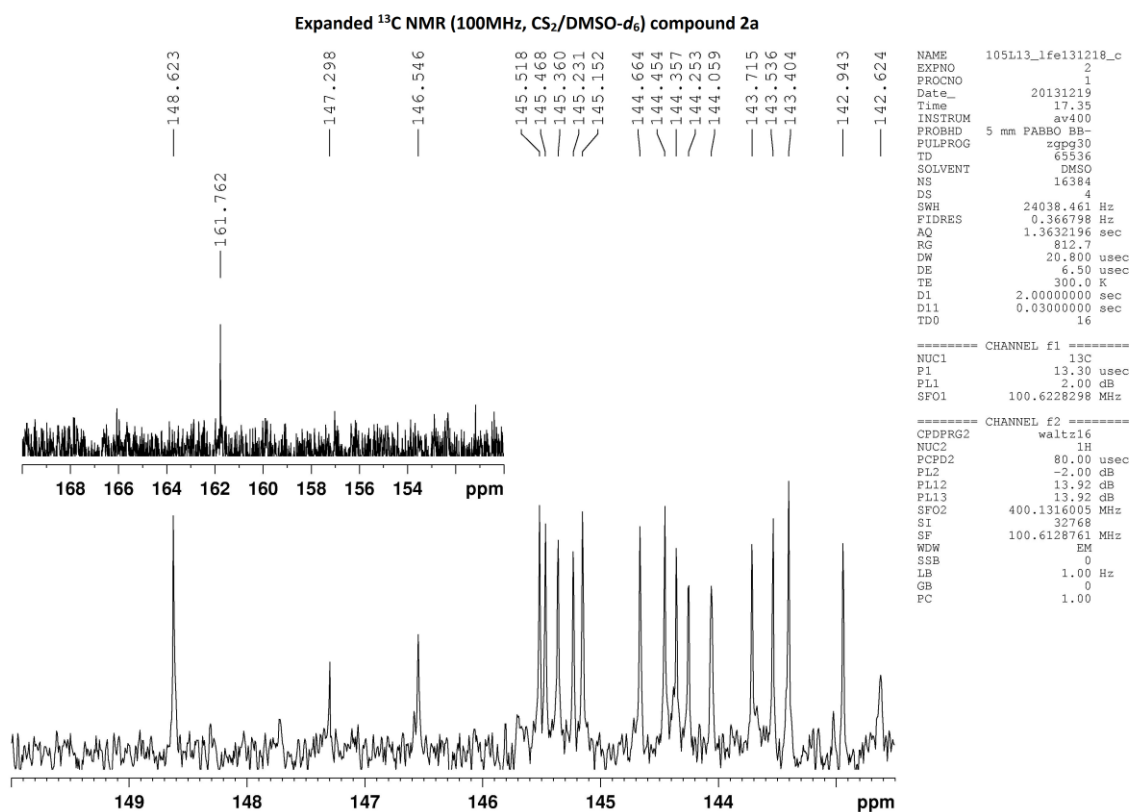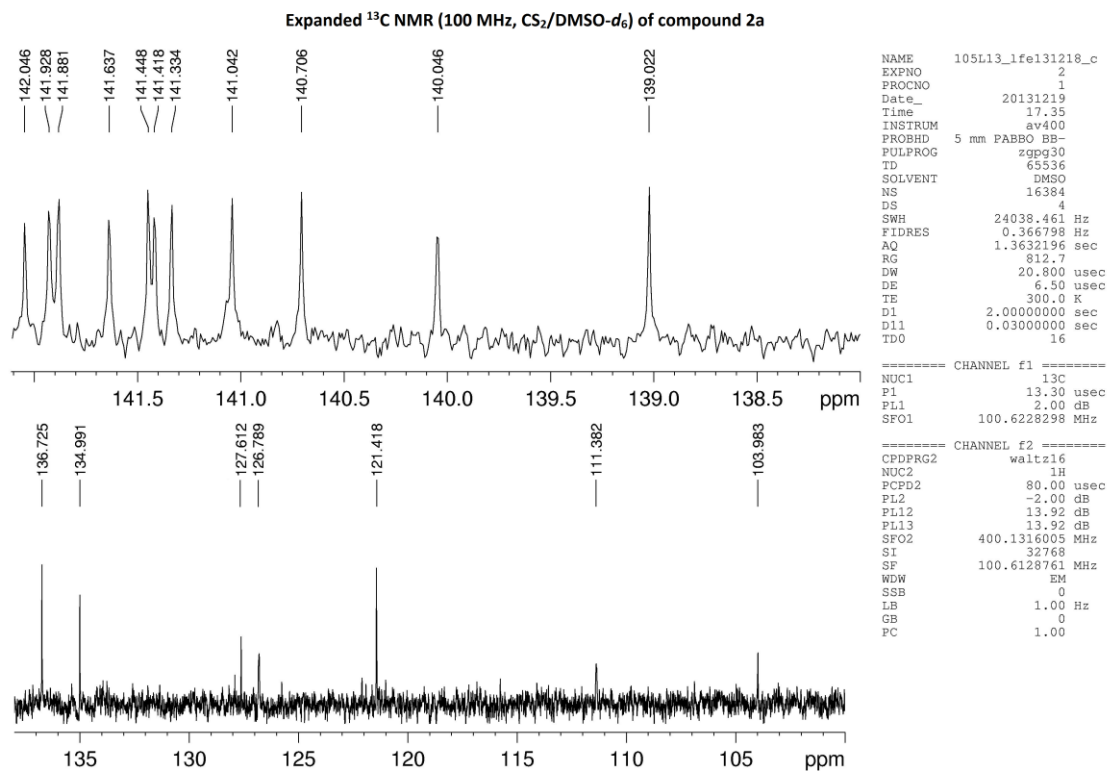

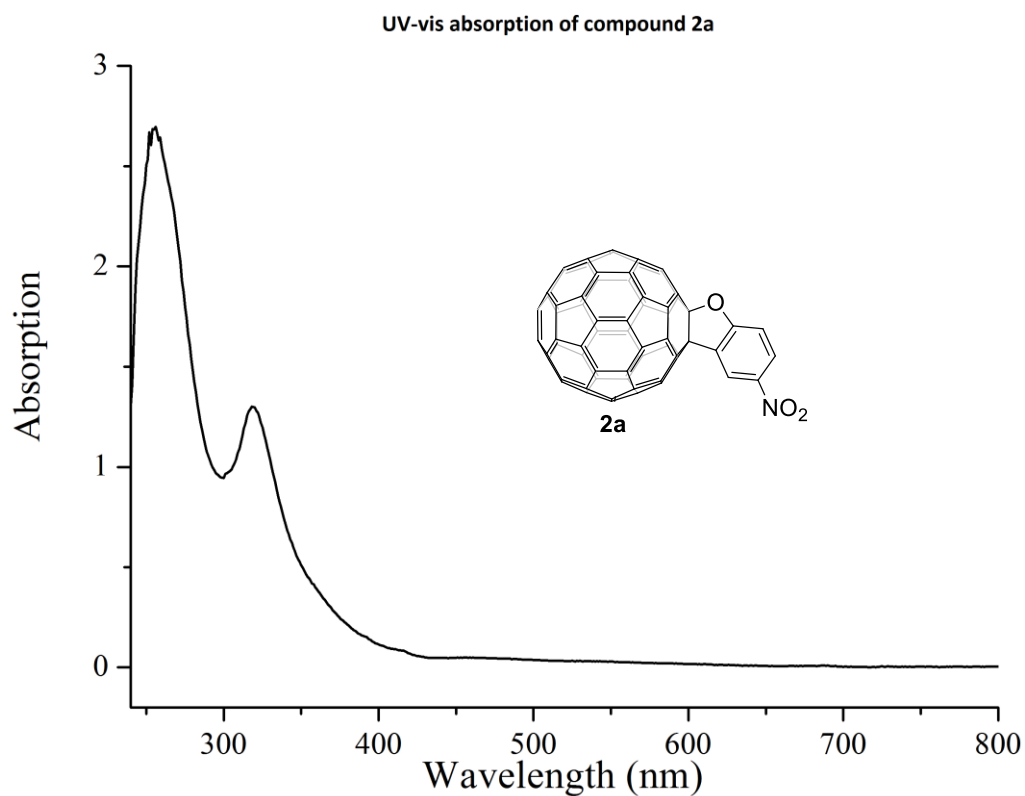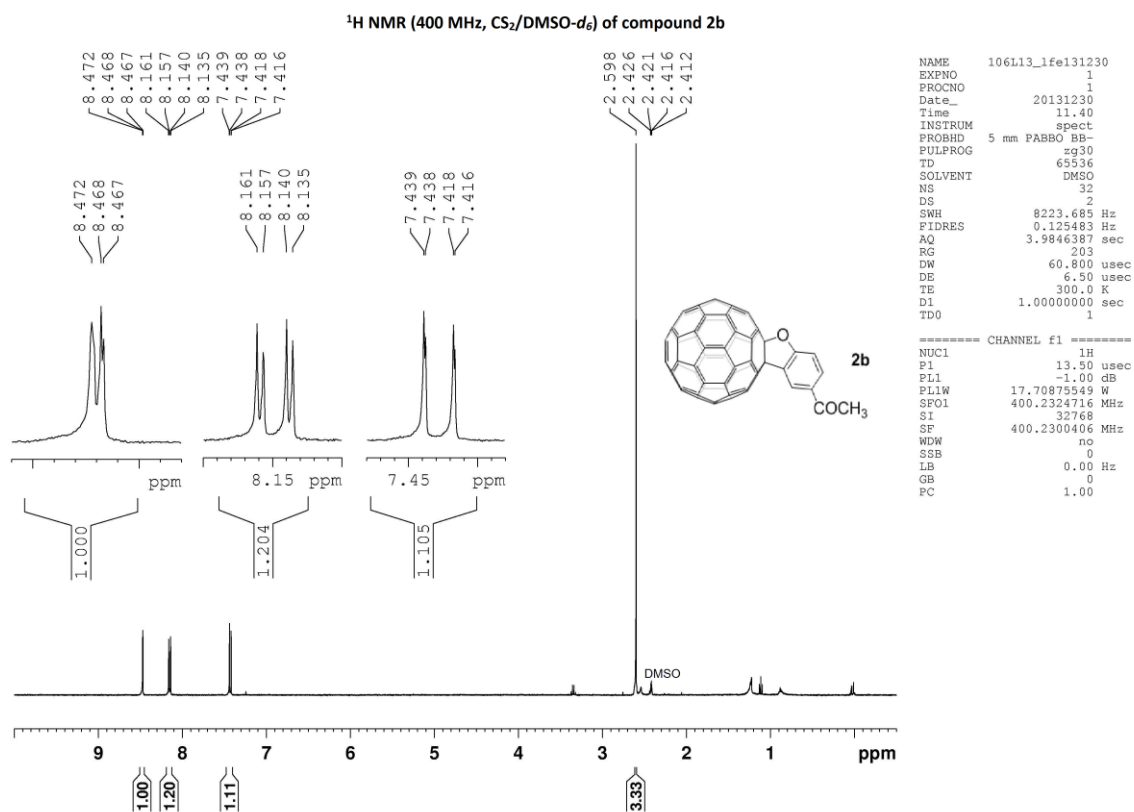

<sup>13</sup>C NMR (100 MHz, CS<sub>2</sub>/DMSO-*d*<sub>6</sub>) of compound 2b

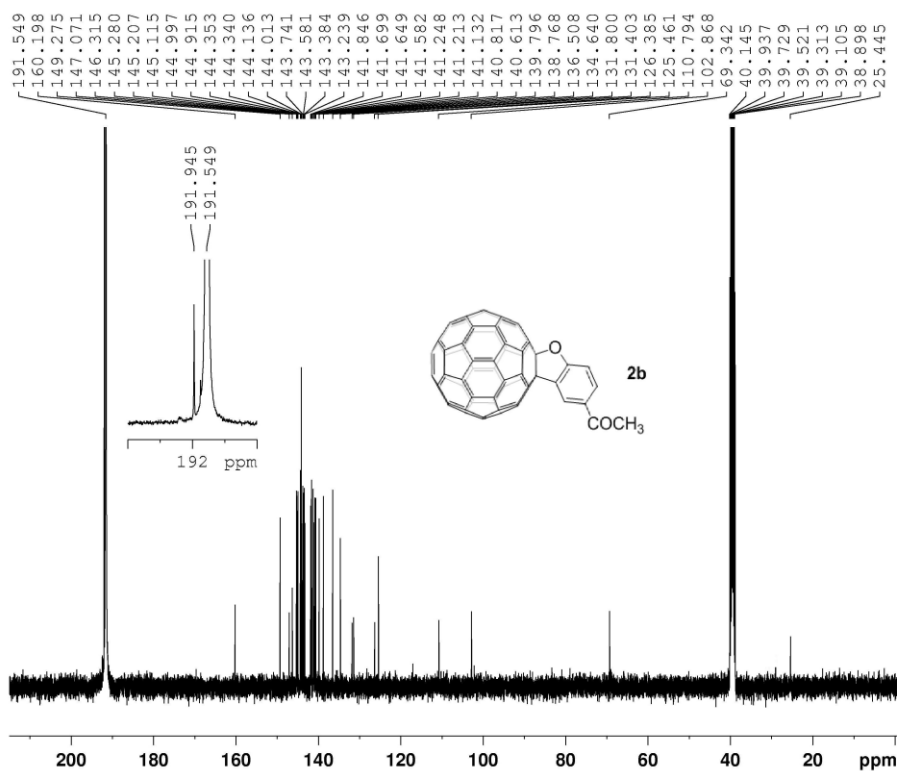

```

NAME      105L13_lfe131231
EXPNO     2
PROCNO    1
Date_     20131231
Time      17.50
INSTRUM   av400
PROBHD    5 mm PABBO BB-
PULPROG   zgpg30
TD         65536
SOLVENT   DMSO
NS         16384
DS         4
SWH        24038.461 Hz
FIDRES     0.366798 Hz
AQ          1.3632196 sec
RG          812.7
DW          20.800 usec
DE          6.50 usec
TE          300.3 K
D1          2.00000000 sec
D11         0.03000000 sec
TD0        16

===== CHANNEL f1 =====
NUC1       13C
P1         13.30 usec
PL1        2.00 dB
SFO1       100.6228298 MHz

===== CHANNEL f2 =====
CPDPRG2    waltz16
NUC2       1H
PCPD2      80.00 usec
PL2        -2.00 dB
PL12       13.92 dB
PL13       13.92 dB
SFO2       400.1316005 MHz
SI         32768
SF         100.6128942 MHz
WDW        EM
SSB        0
LB         0.50 Hz
GB         0
PC         1.00
    
```

Expanded <sup>13</sup>C NMR (100 MHz, CS<sub>2</sub>/DMSO-*d*<sub>6</sub>) of compound 2b

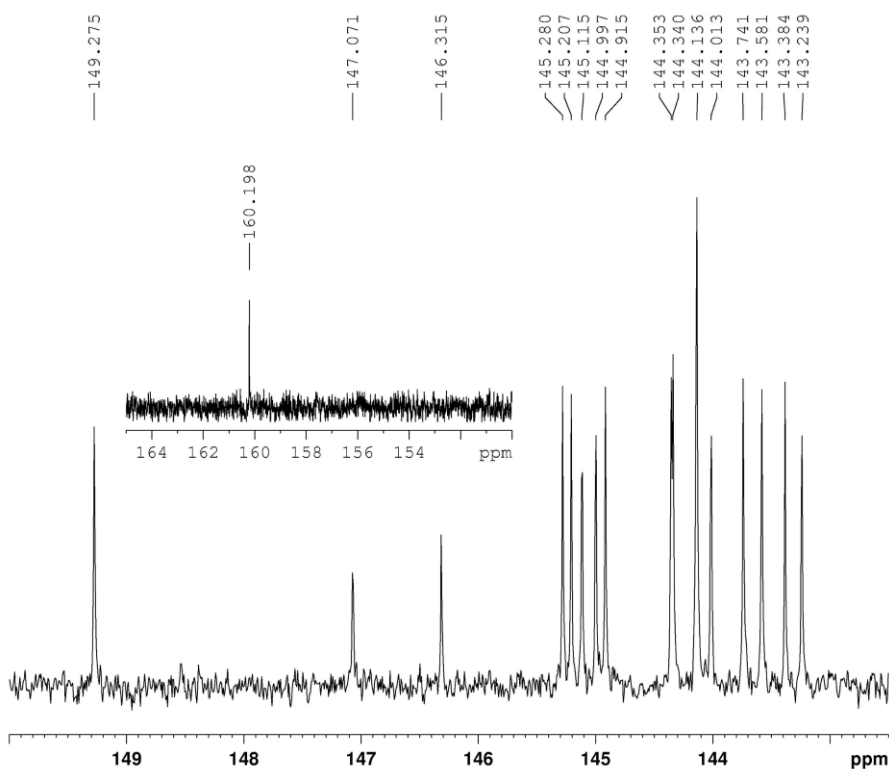

```

NAME      105L13_lfe131231
EXPNO     2
PROCNO    1
Date_     20131231
Time      17.50
INSTRUM   av400
PROBHD    5 mm PABBO BB-
PULPROG   zgpg30
TD         65536
SOLVENT   DMSO
NS         16384
DS         4
SWH        24038.461 Hz
FIDRES     0.366798 Hz
AQ          1.3632196 sec
RG          812.7
DW          20.800 usec
DE          6.50 usec
TE          300.3 K
D1          2.00000000 sec
D11         0.03000000 sec
TD0        16

===== CHANNEL f1 =====
NUC1       13C
P1         13.30 usec
PL1        2.00 dB
SFO1       100.6228298 MHz

===== CHANNEL f2 =====
CPDPRG2    waltz16
NUC2       1H
PCPD2      80.00 usec
PL2        -2.00 dB
PL12       13.92 dB
PL13       13.92 dB
SFO2       400.1316005 MHz
SI         32768
SF         100.6128942 MHz
WDW        EM
SSB        0
LB         0.50 Hz
GB         0
PC         1.00
    
```

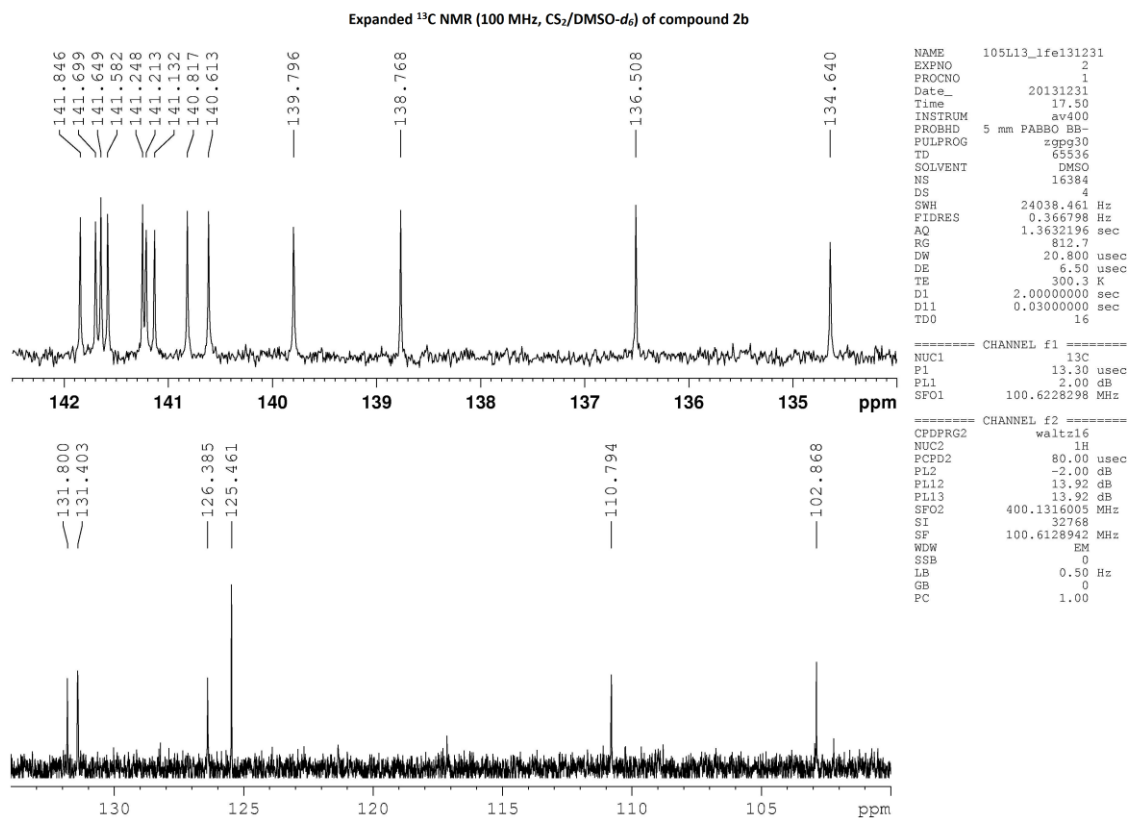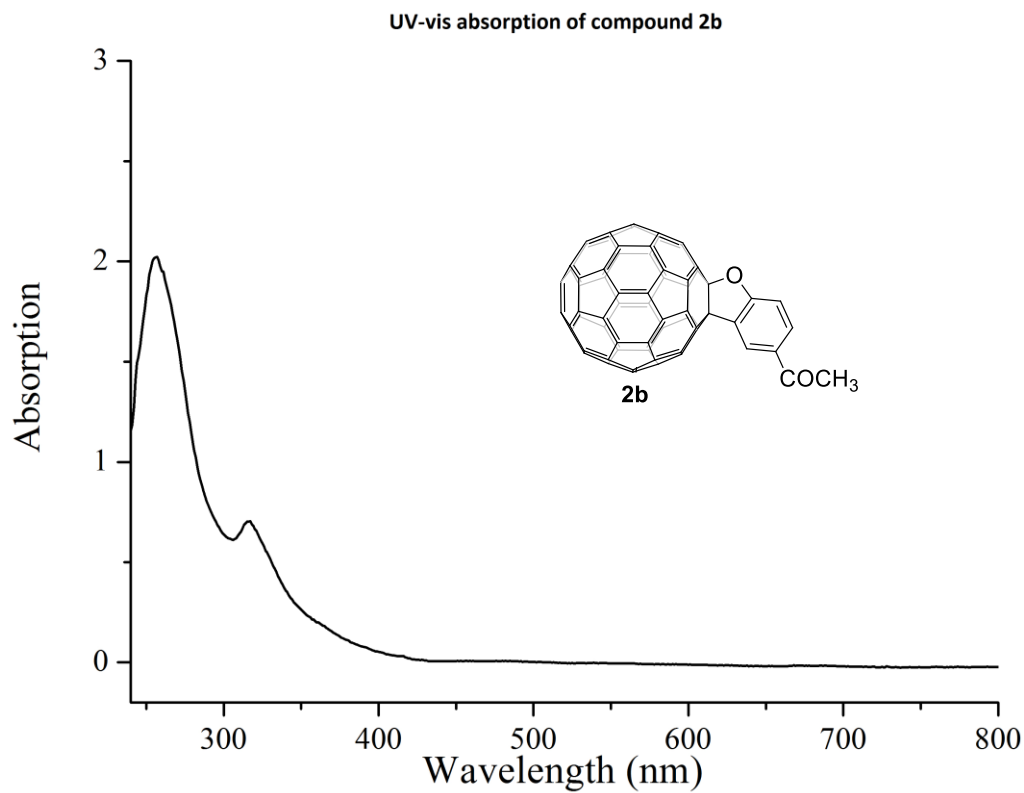

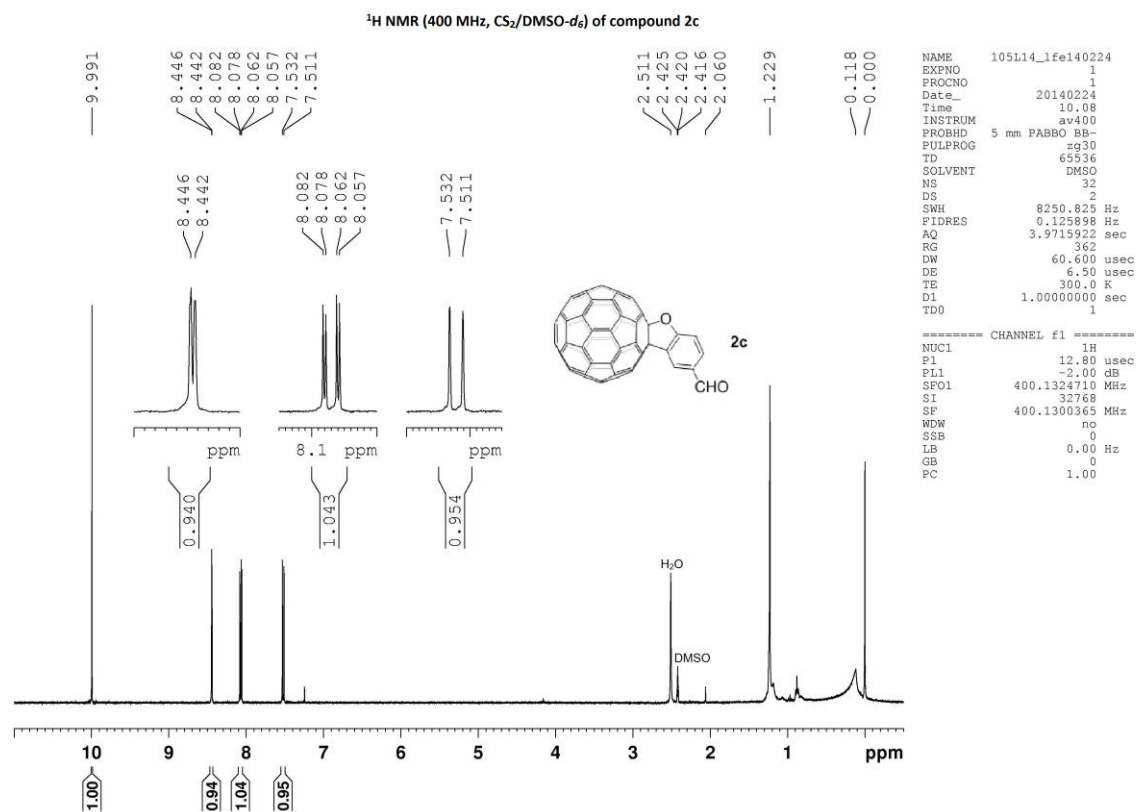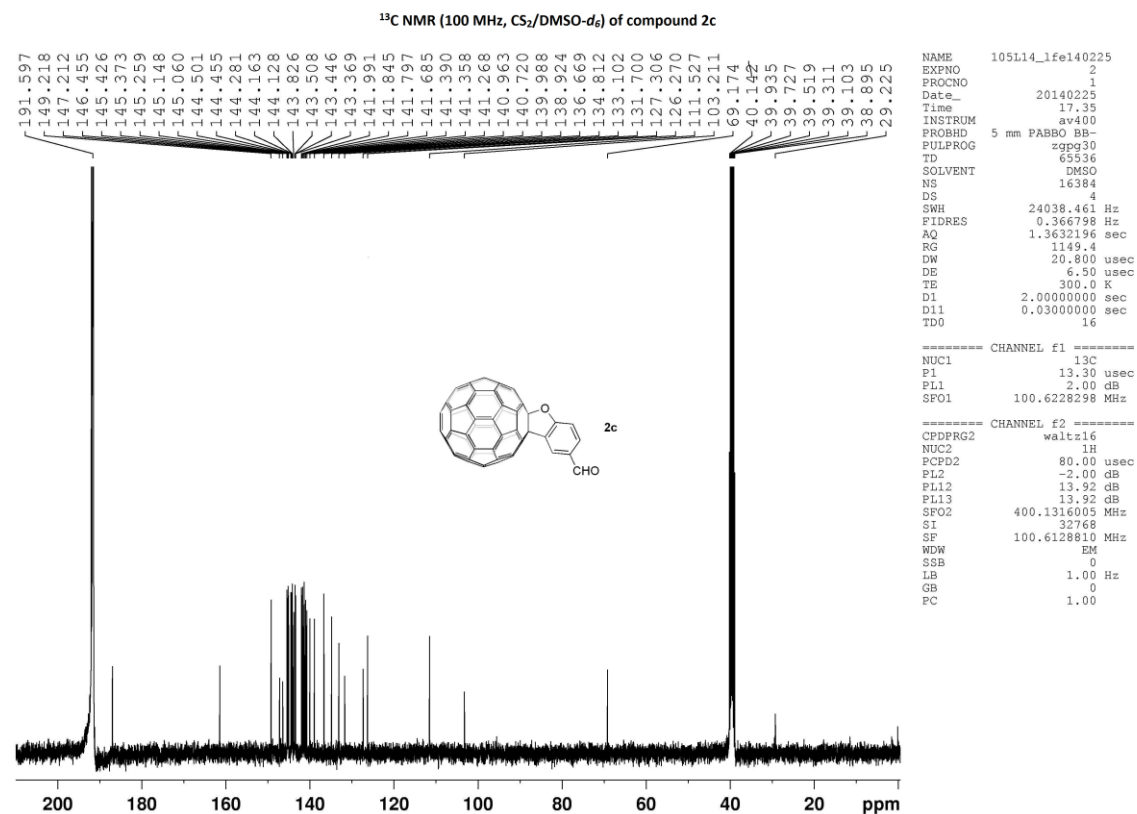

Expanded <sup>13</sup>C NMR (100 MHz, CS<sub>2</sub>/DMSO-*d*<sub>6</sub>) of compound 2c

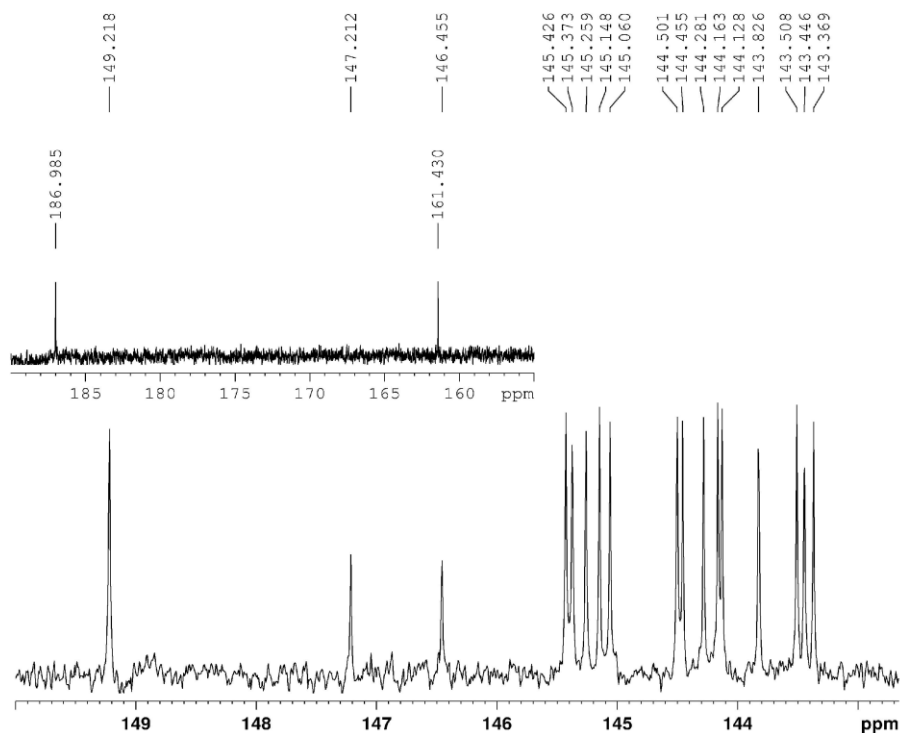

```

NAME 105L14_lfe140225
EXPNO 2
PROCNO 1
Date_ 20140225
Time 17.35
INSTRUM av400
PROBHD 5 mm PABBO BB-
PULPROG zgpg30
TD 65536
SOLVENT DMSO
NS 16384
DS 4
SWH 24038.461 Hz
FIDRES 0.366798 Hz
AQ 1.3632196 sec
RG 1149.4
DW 20.800 usec
DE 6.50 usec
TE 300.0 K
D1 2.00000000 sec
D11 0.03000000 sec
TD0 16

```

```

===== CHANNEL f1 =====
NUC1 13C
P1 13.30 usec
PL1 2.00 dB
SFO1 100.6228298 MHz

===== CHANNEL f2 =====
CPDPRG2 waltz16
NUC2 1H
PCPD2 80.00 usec
PL2 -2.00 dB
PL12 13.92 dB
PL13 13.92 dB
SFO2 400.1316005 MHz
SI 32768
SF 100.6128810 MHz
WDW EM
SSB 0
LB 1.00 Hz
GB 0
PC 1.00

```

Expanded <sup>13</sup>C NMR (100 MHz, CS<sub>2</sub>/DMSO-*d*<sub>6</sub>) of compound 2c

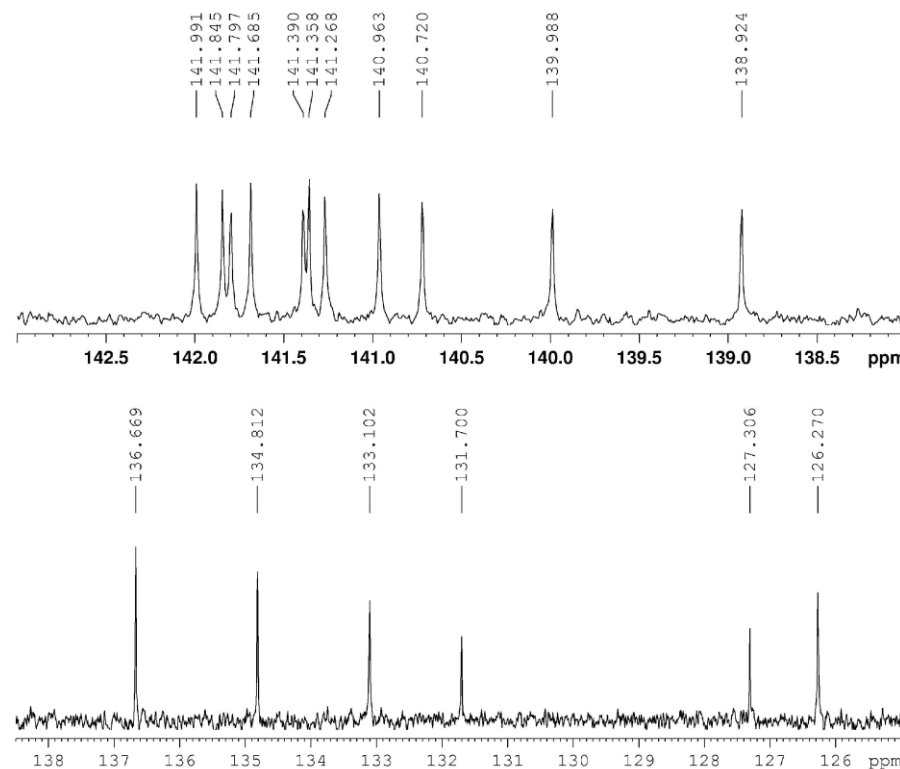

```

NAME 105L14_lfe140225
EXPNO 2
PROCNO 1
Date_ 20140225
Time 17.35
INSTRUM av400
PROBHD 5 mm PABBO BB-
PULPROG zgpg30
TD 65536
SOLVENT DMSO
NS 16384
DS 4
SWH 24038.461 Hz
FIDRES 0.366798 Hz
AQ 1.3632196 sec
RG 1149.4
DW 20.800 usec
DE 6.50 usec
TE 300.0 K
D1 2.00000000 sec
D11 0.03000000 sec
TD0 16

```

```

===== CHANNEL f1 =====
NUC1 13C
P1 13.30 usec
PL1 2.00 dB
SFO1 100.6228298 MHz

===== CHANNEL f2 =====
CPDPRG2 waltz16
NUC2 1H
PCPD2 80.00 usec
PL2 -2.00 dB
PL12 13.92 dB
PL13 13.92 dB
SFO2 400.1316005 MHz
SI 32768
SF 100.6128810 MHz
WDW EM
SSB 0
LB 1.00 Hz
GB 0
PC 1.00

```

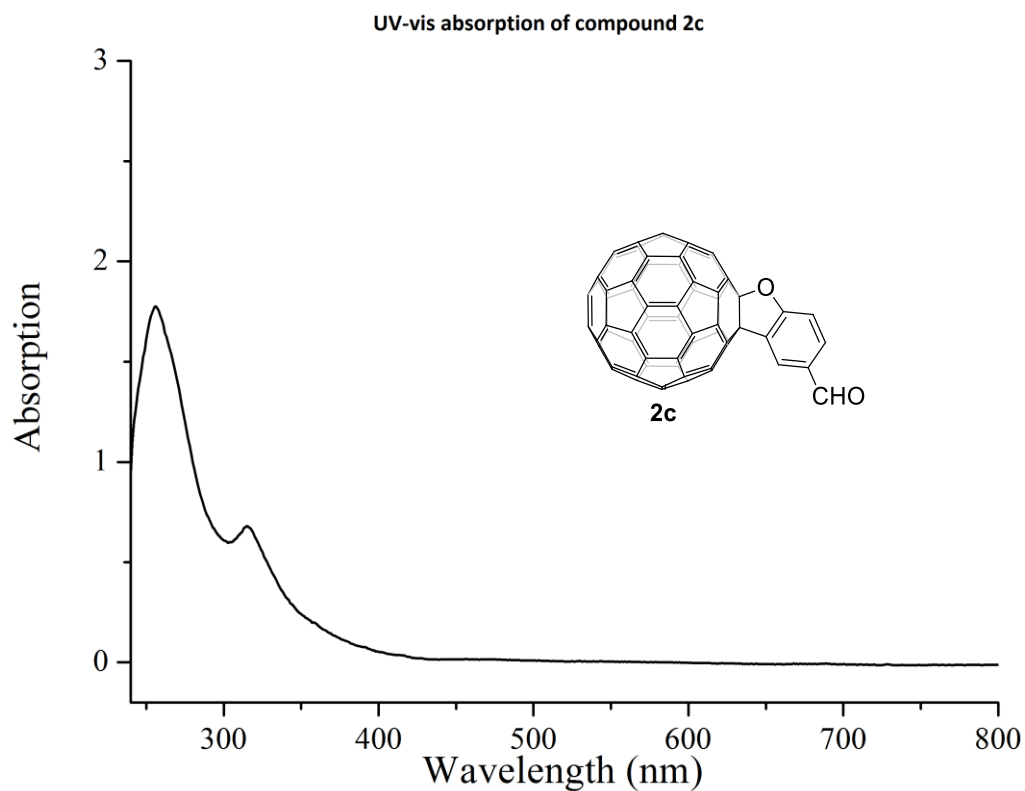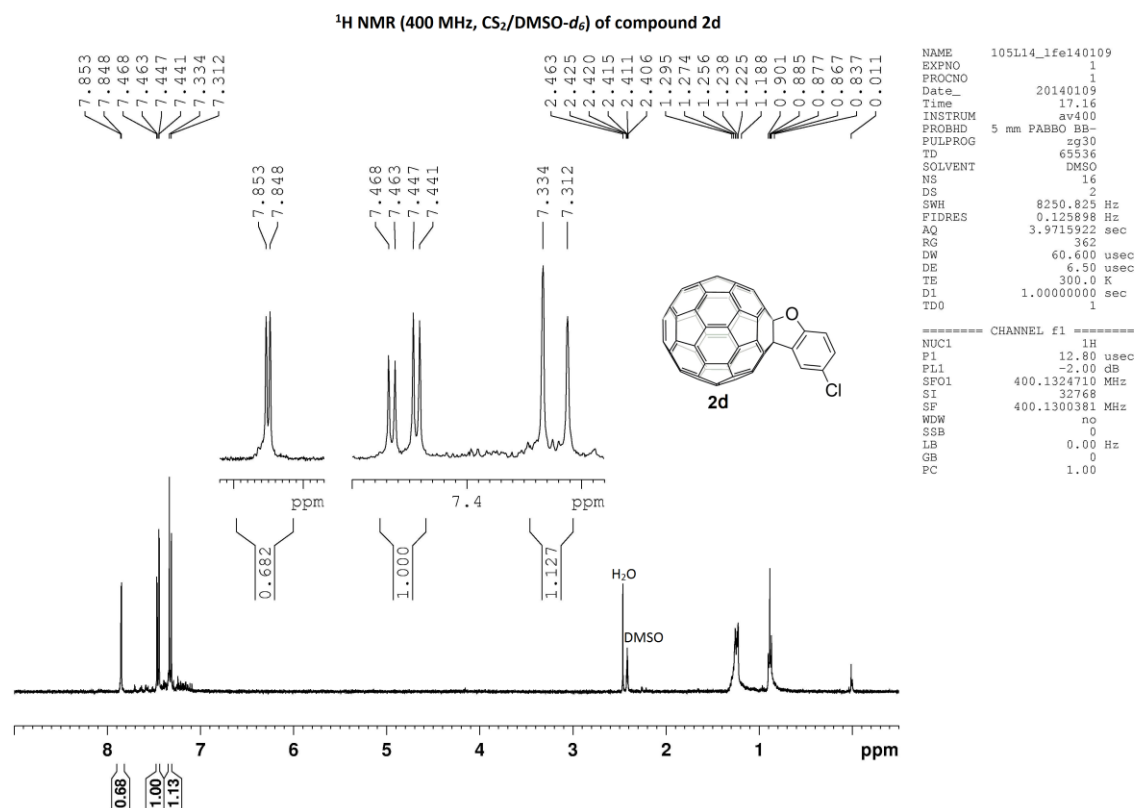

**$^{13}\text{C}$  NMR (100 MHz,  $\text{CS}_2/\text{DMSO}-d_6$ ) of compound 2d**

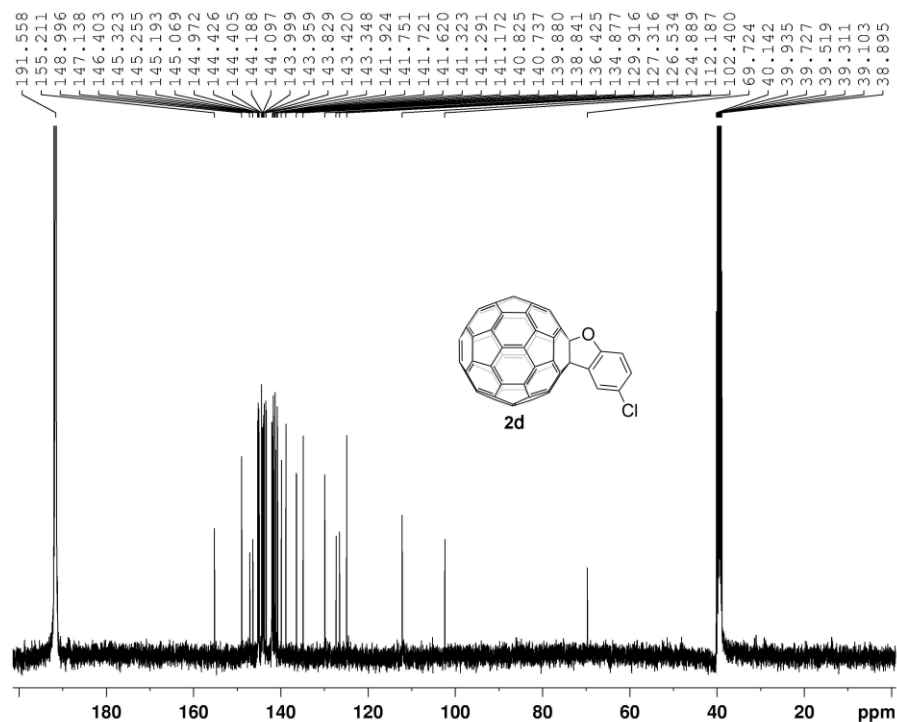

```

NAME      105L14_lfe140110
EXPNO     2
PROCNO    1
Date_     20140110
Time      19.02
INSTRUM   av400
PROBHD    5 mm PABBO BB-
PULPROG   zgpg30
TD         65536
SOLVENT   DMSO
NS         16384
DS         4
SWH        24038.461 Hz
FIDRES     0.366798 Hz
AQ         1.3632196 sec
RG         1149.4
DW         20.800 usec
DE         6.50 usec
TE         300.0 K
D1         2.00000000 sec
D11        0.03000000 sec
TD0        16

===== CHANNEL f1 =====
NUC1       13C
P1         13.30 usec
PL1        2.00 dB
SFO1       100.6228298 MHz

===== CHANNEL f2 =====
CPDPRG2    waltz16
NUC2        1H
PCPD2       80.00 usec
PL2         -2.00 dB
PL12        13.92 dB
PL13        13.92 dB
SFO2        400.1316005 MHz
SI          32768
SF          100.6128869 MHz
WDW         EM
SSB         0
LB          1.00 Hz
GB          0
PC          0.50
    
```

**Expanded  $^{13}\text{C}$  NMR (100 MHz,  $\text{CS}_2/\text{DMSO}-d_6$ ) of compound 2d**

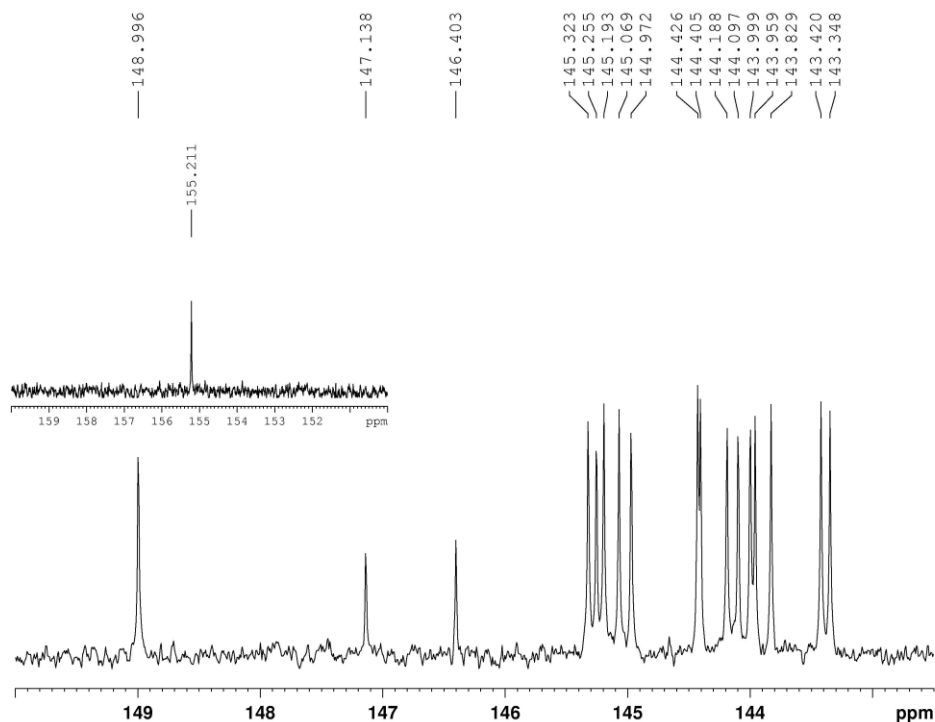

```

NAME      105L14_lfe140110
EXPNO     2
PROCNO    1
Date_     20140110
Time      19.02
INSTRUM   av400
PROBHD    5 mm PABBO BB-
PULPROG   zgpg30
TD         65536
SOLVENT   DMSO
NS         16384
DS         4
SWH        24038.461 Hz
FIDRES     0.366798 Hz
AQ         1.3632196 sec
RG         1149.4
DW         20.800 usec
DE         6.50 usec
TE         300.0 K
D1         2.00000000 sec
D11        0.03000000 sec
TD0        16

===== CHANNEL f1 =====
NUC1       13C
P1         13.30 usec
PL1        2.00 dB
SFO1       100.6228298 MHz

===== CHANNEL f2 =====
CPDPRG2    waltz16
NUC2        1H
PCPD2       80.00 usec
PL2         -2.00 dB
PL12        13.92 dB
PL13        13.92 dB
SFO2        400.1316005 MHz
SI          32768
SF          100.6128869 MHz
WDW         EM
SSB         0
LB          1.00 Hz
GB          0
PC          0.50
    
```

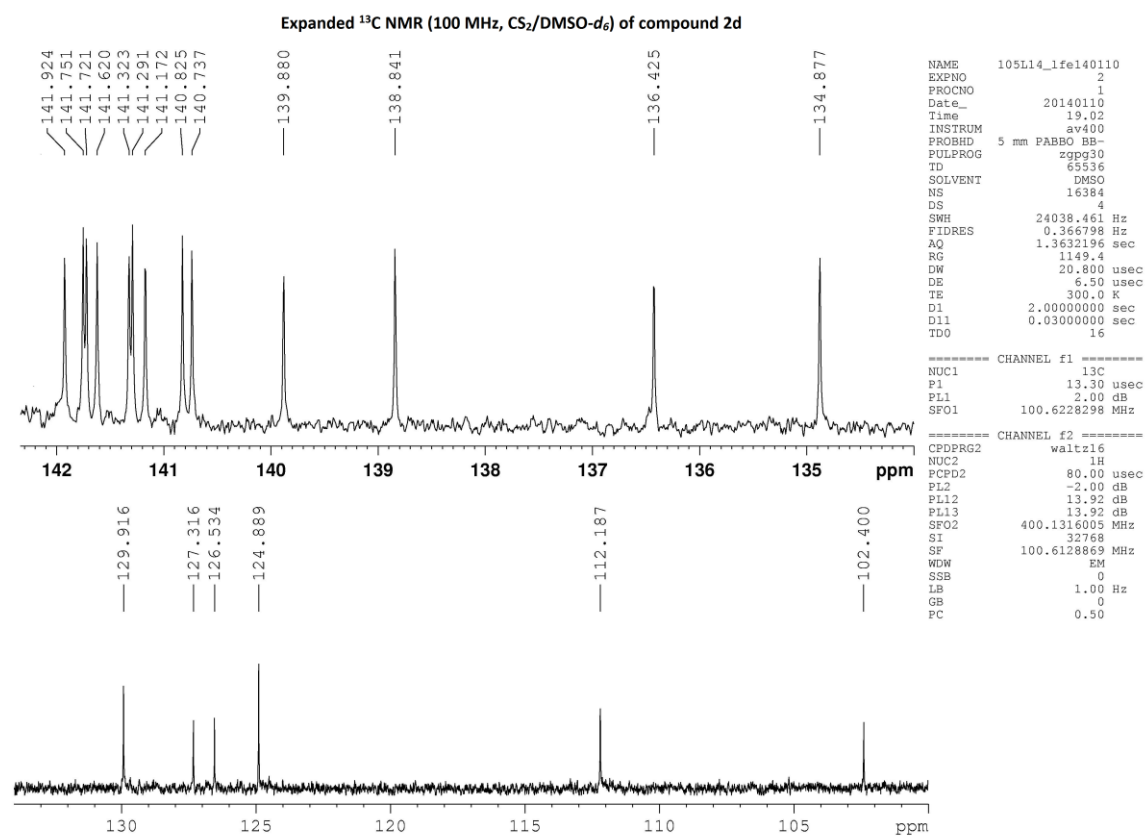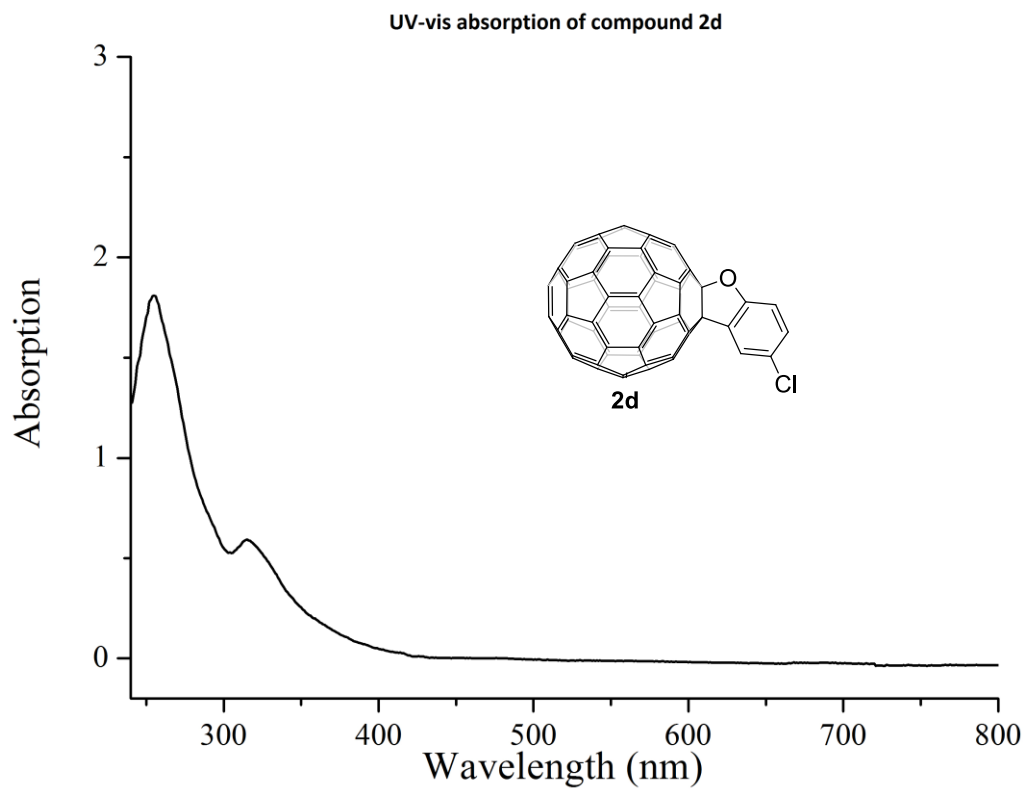

<sup>1</sup>H NMR (400 MHz, CS<sub>2</sub>/DMSO-*d*<sub>6</sub>) of compound 2e

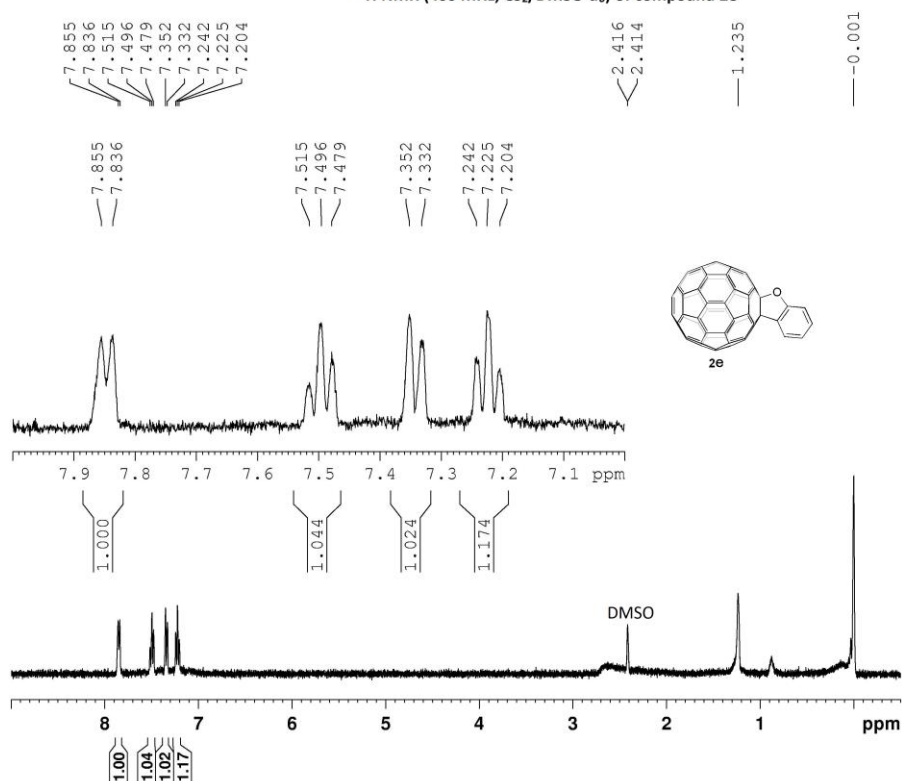

<sup>13</sup>C NMR (100 MHz, CS<sub>2</sub>/DMSO-*d*<sub>6</sub>) of compound 2e

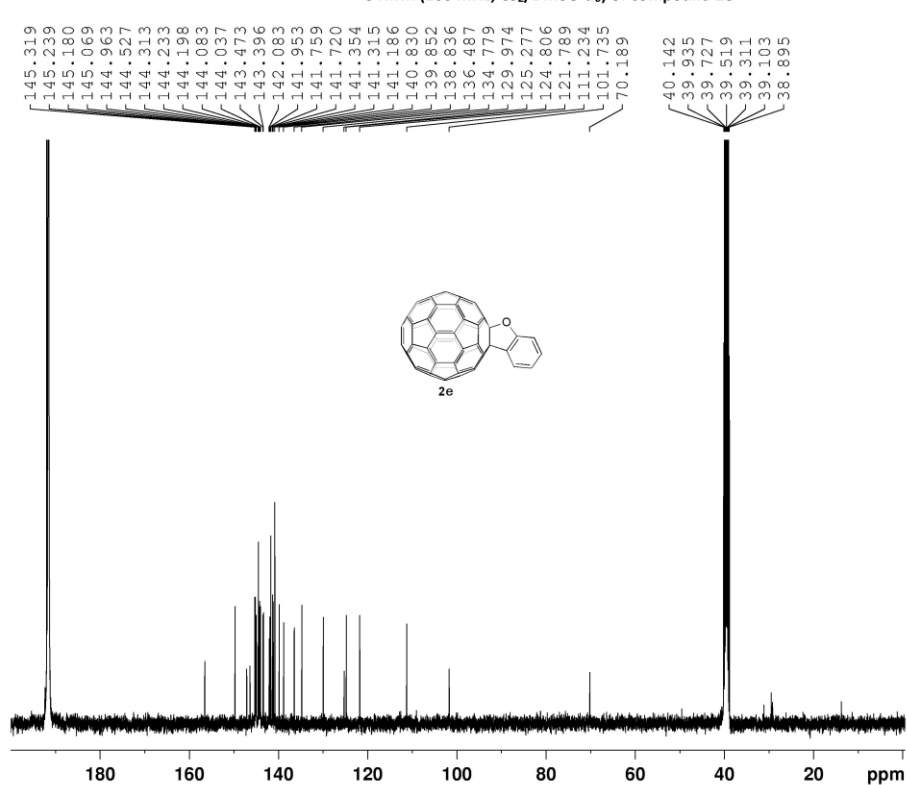

Expanded  $^{13}\text{C}$  NMR (100 MHz,  $\text{CS}_2/\text{DMSO}-d_6$ ) of compound 2e

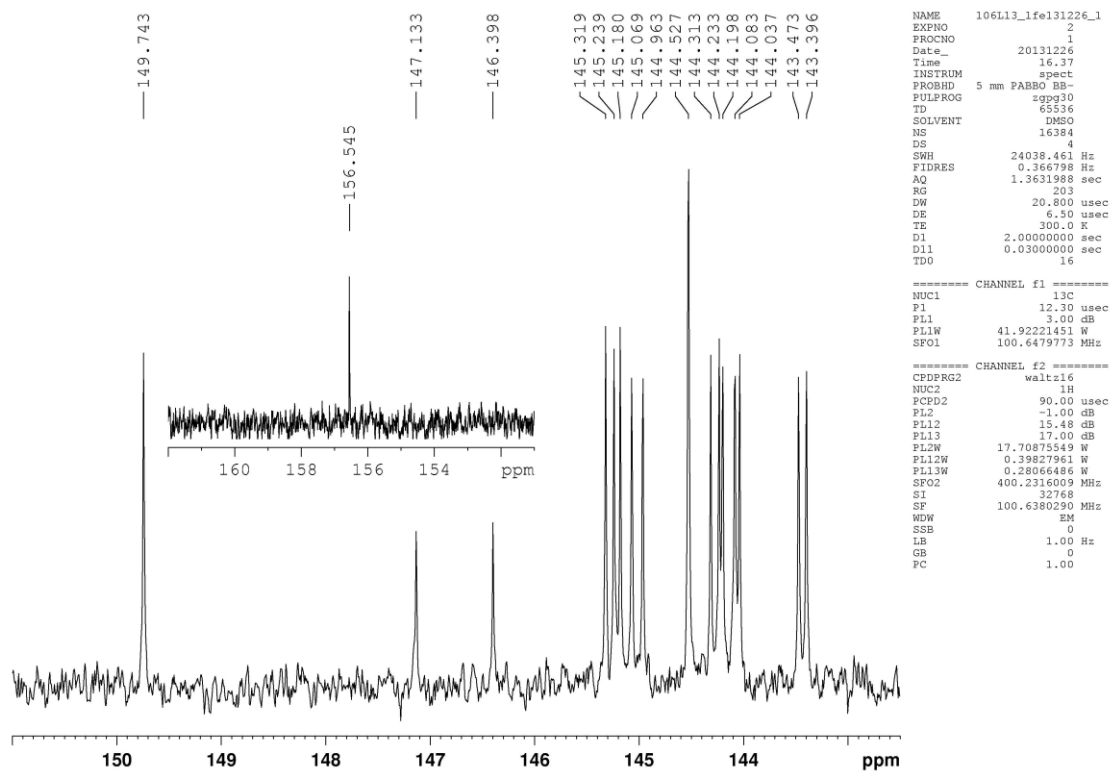

Expanded  $^{13}\text{C}$  NMR (100 MHz,  $\text{CS}_2/\text{DMSO}-d_6$ ) of compound 2e

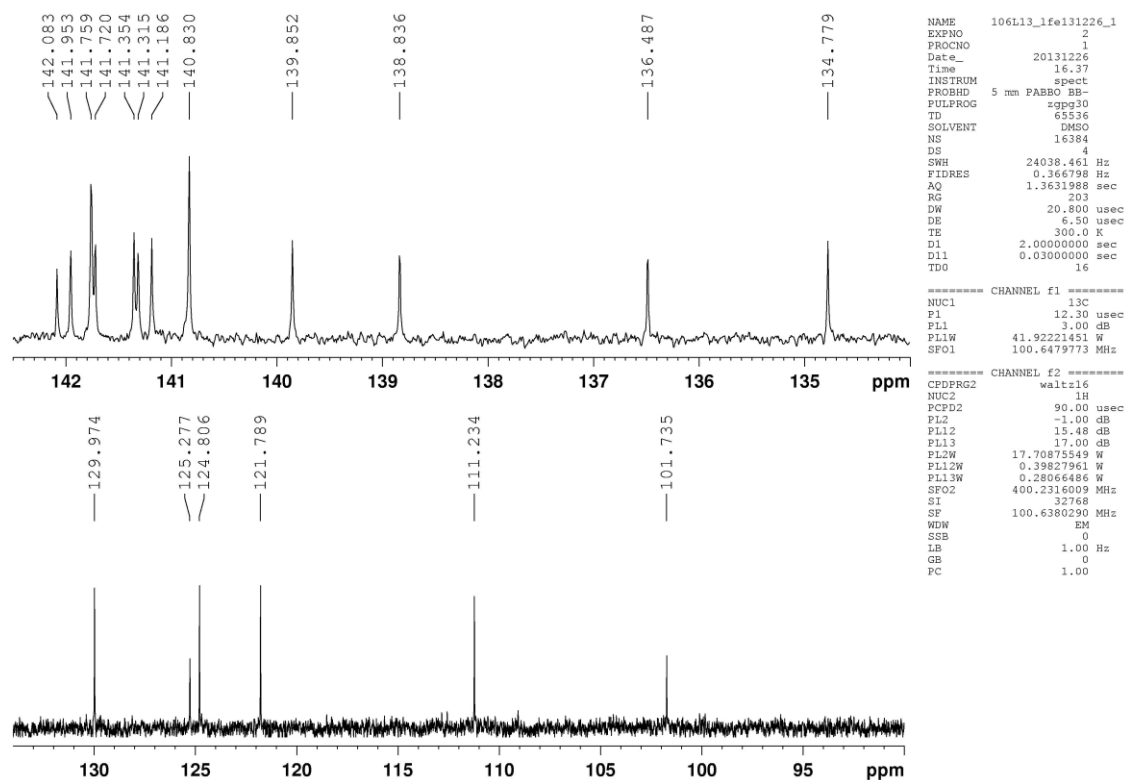

UV-vis absorption of compound 2e

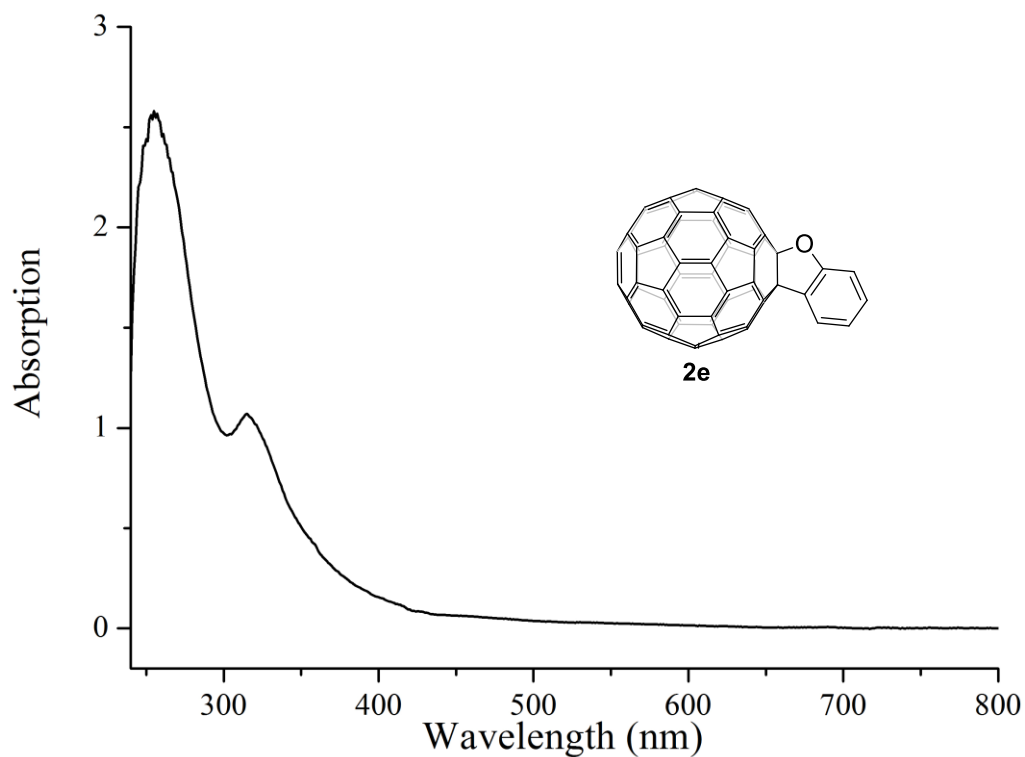

$^1\text{H}$  NMR (400 MHz,  $\text{CS}_2/\text{DMSO}-d_6$ ) of compound 2f

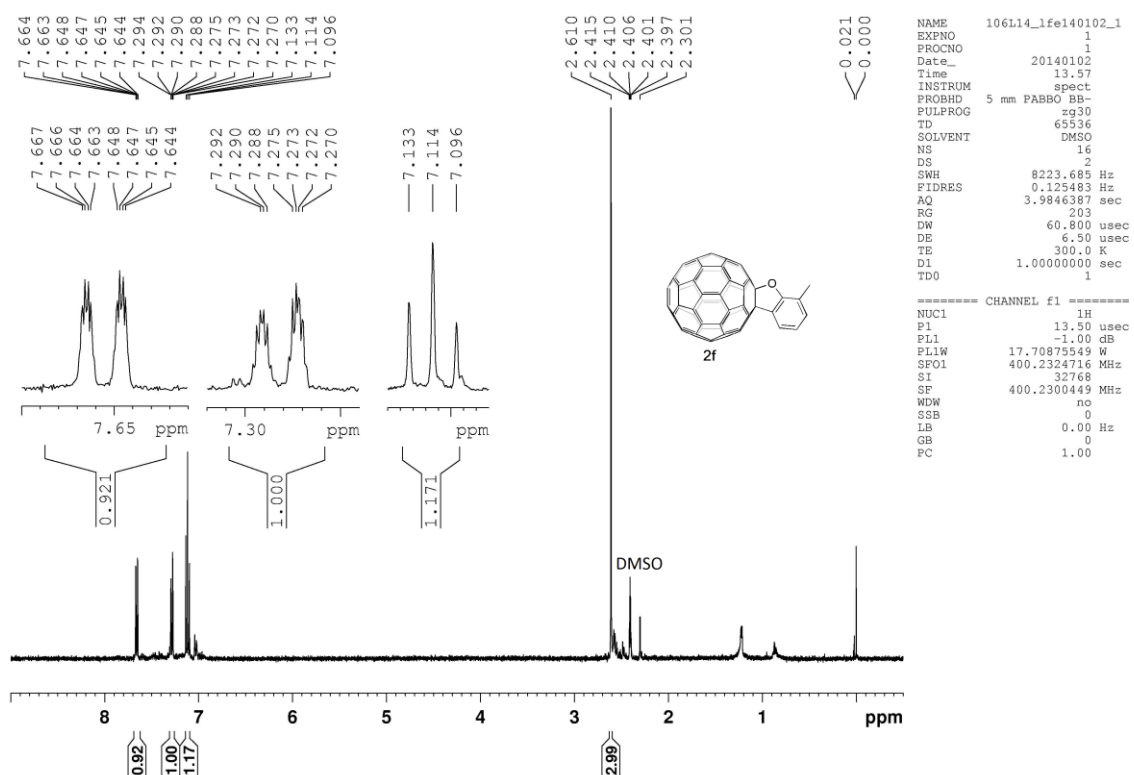

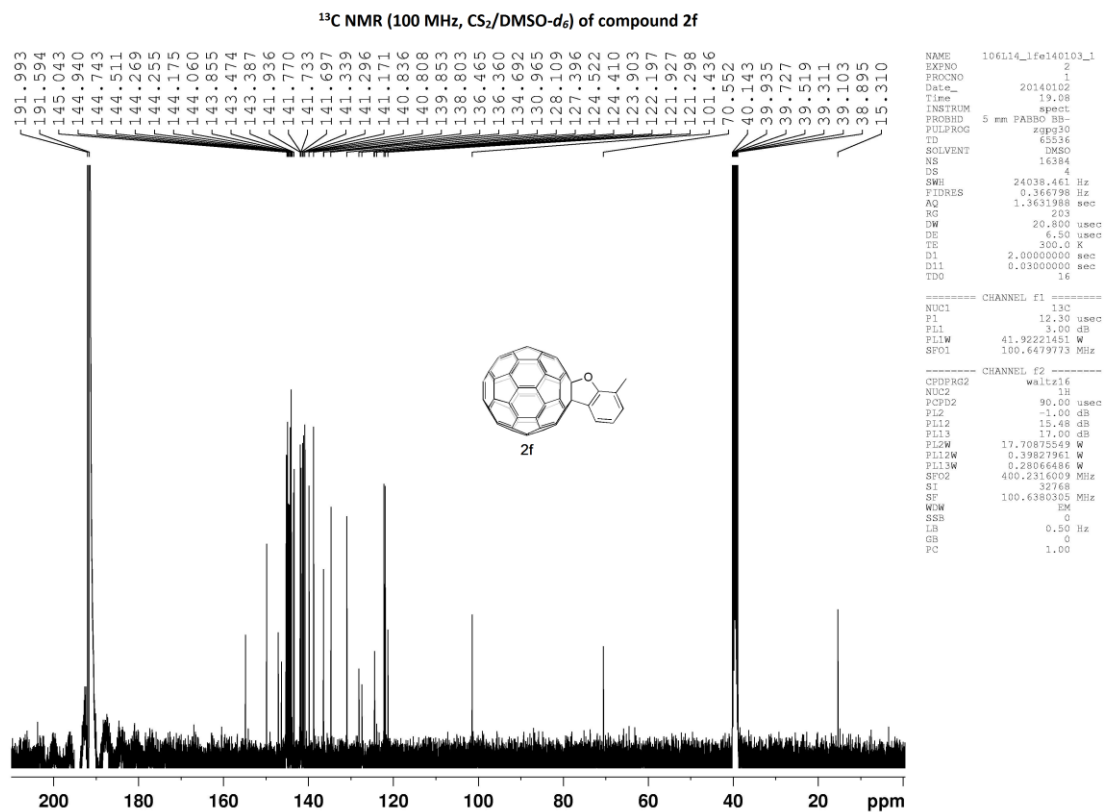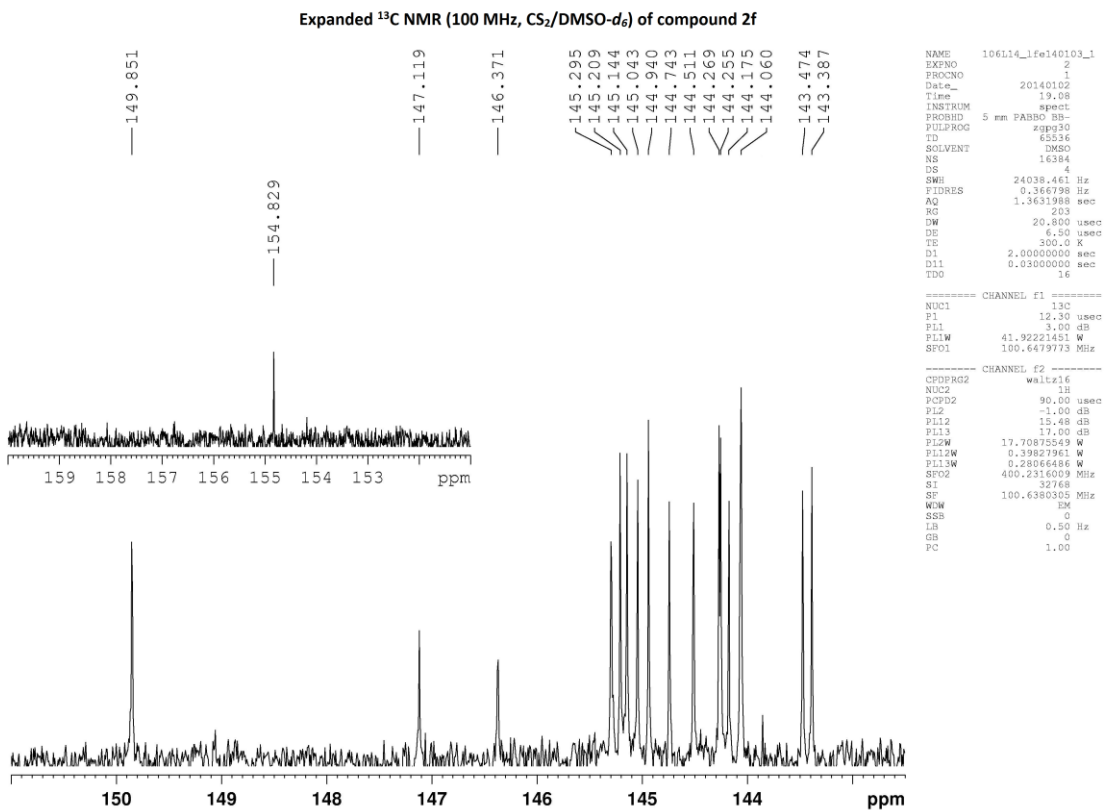

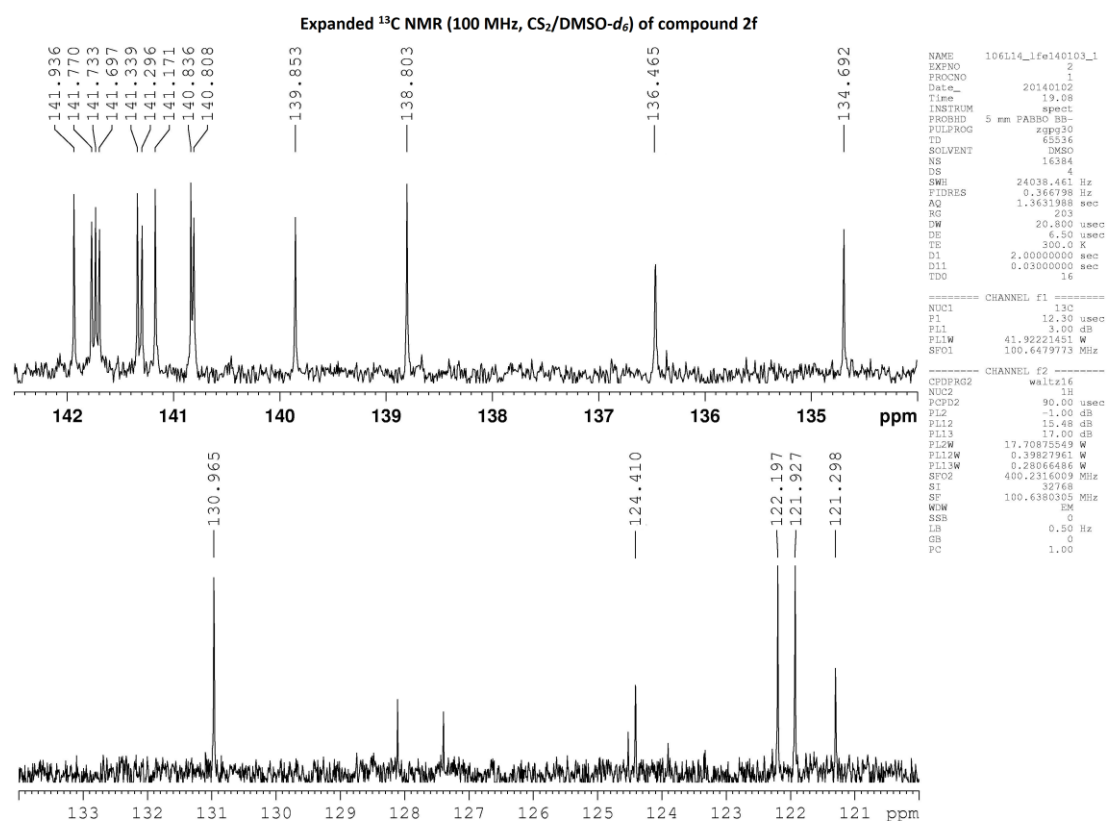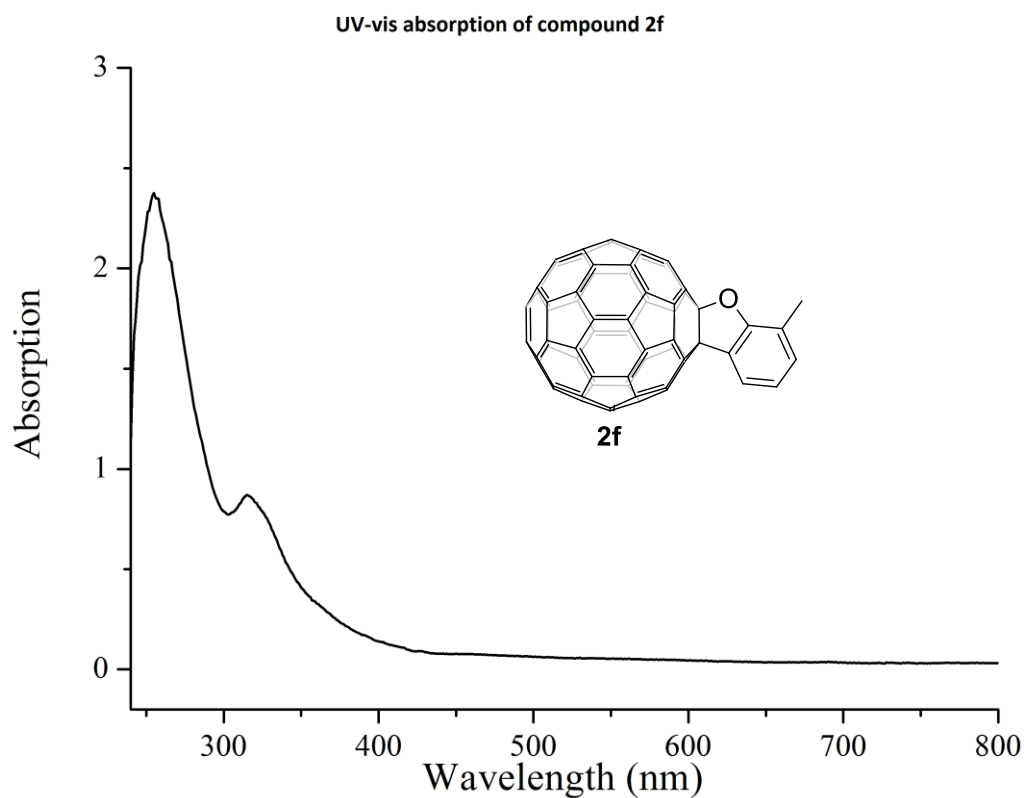

<sup>1</sup>H NMR (400 MHz, CS<sub>2</sub>/DMSO-*d*<sub>6</sub>) of compound 2g

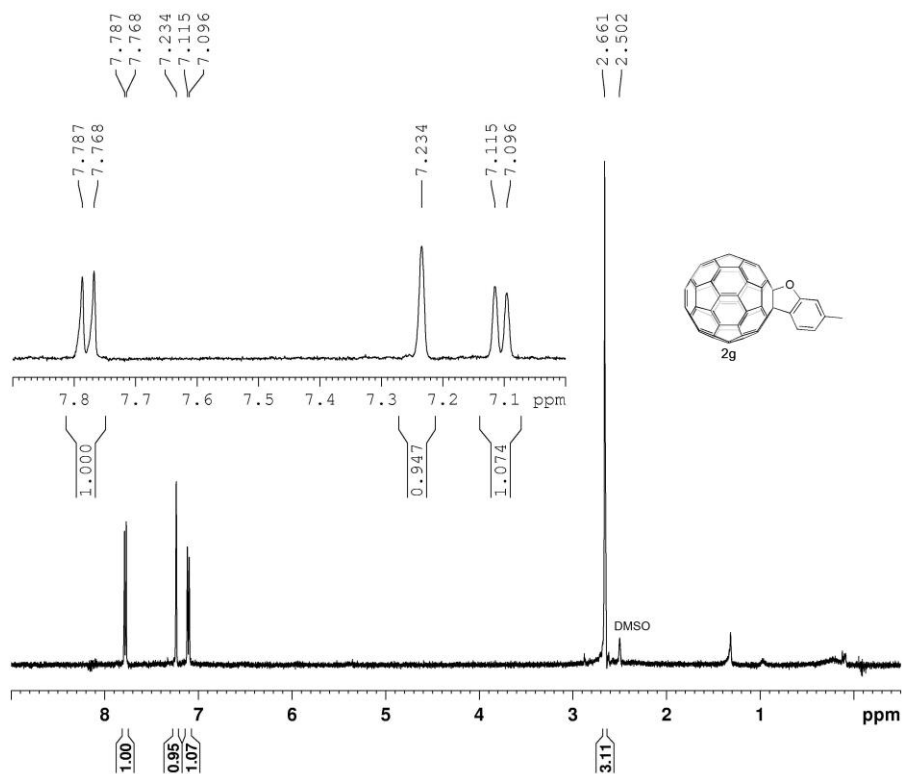

```

NAME      105L14_lfe140518_2
EXPNO     1
PROCNO    1
Date_     20140528
Time      17.40
INSTRUM   av400
PROBHD    5 mm BBO BB-1H
PULPROG   zg30
TD         65536
SOLVENT   DMSO
NS         32
DS         2
SWH        8250.825 Hz
FIDRES     0.125898 Hz
AQ         3.9715922 sec
RG         362
DW         60.600 usec
DE         6.50 usec
TE         300.0 K
D1         1.00000000 sec
TD0        1
  
```

```

===== CHANNEL f1 =====
NUC1      1H
P1        13.40 usec
PL1       0.00 dB
SFO1      400.1324710 MHz
SI        32768
SF        400.1300042 MHz
WDW       no
SSB       0
LB        0.00 Hz
GB        0
PC        1.00
  
```

<sup>13</sup>C NMR (100 MHz, CS<sub>2</sub>/DMSO-*d*<sub>6</sub>) of compound 2g

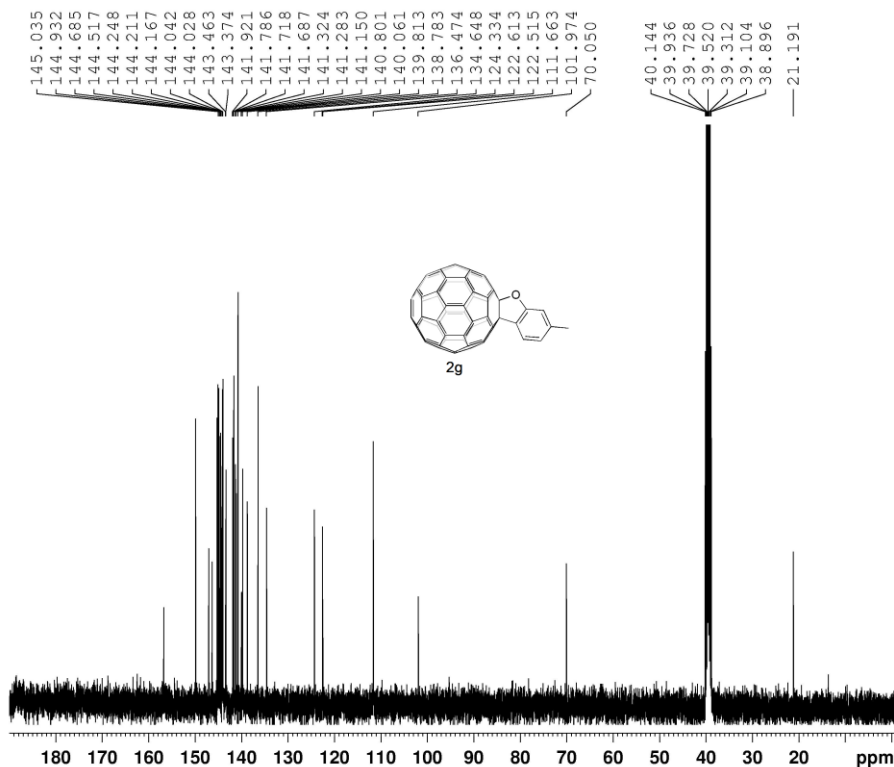

```

NAME      105L13_lfe131226_2
EXPNO     2
PROCNO    1
Date_     20131227
Time      19.17
INSTRUM   av400
PROBHD    5 mm PABBO BB-
PULPROG   zgpg30
TD         65536
SOLVENT   DMSO
NS         16384
DS         4
SWH        24038.461 Hz
FIDRES     0.366798 Hz
AQ         1.3632196 sec
RG         812.7
DW         20.800 usec
DE         6.50 usec
TE         300.0 K
D1         2.00000000 sec
D11        0.03000000 sec
TD0        16
  
```

```

===== CHANNEL f1 =====
NUC1      13C
P1        13.30 usec
PL1       2.00 dB
SFO1      100.6228298 MHz
  
```

```

===== CHANNEL f2 =====
CPDPRG2   waltz16
NUC2      1H
PCPD2     80.00 usec
PL2       2.00 dB
PL12      13.92 dB
PL13      13.92 dB
SFO2      400.1316005 MHz
SI        32768
SF        100.6128852 MHz
WDW       EM
SSB       0
LB        0.50 Hz
GB        0
PC        1.20
  
```

Expanded  $^{13}\text{C}$  NMR (100 MHz,  $\text{CS}_2/\text{DMSO}-d_6$ ) of compound 2g

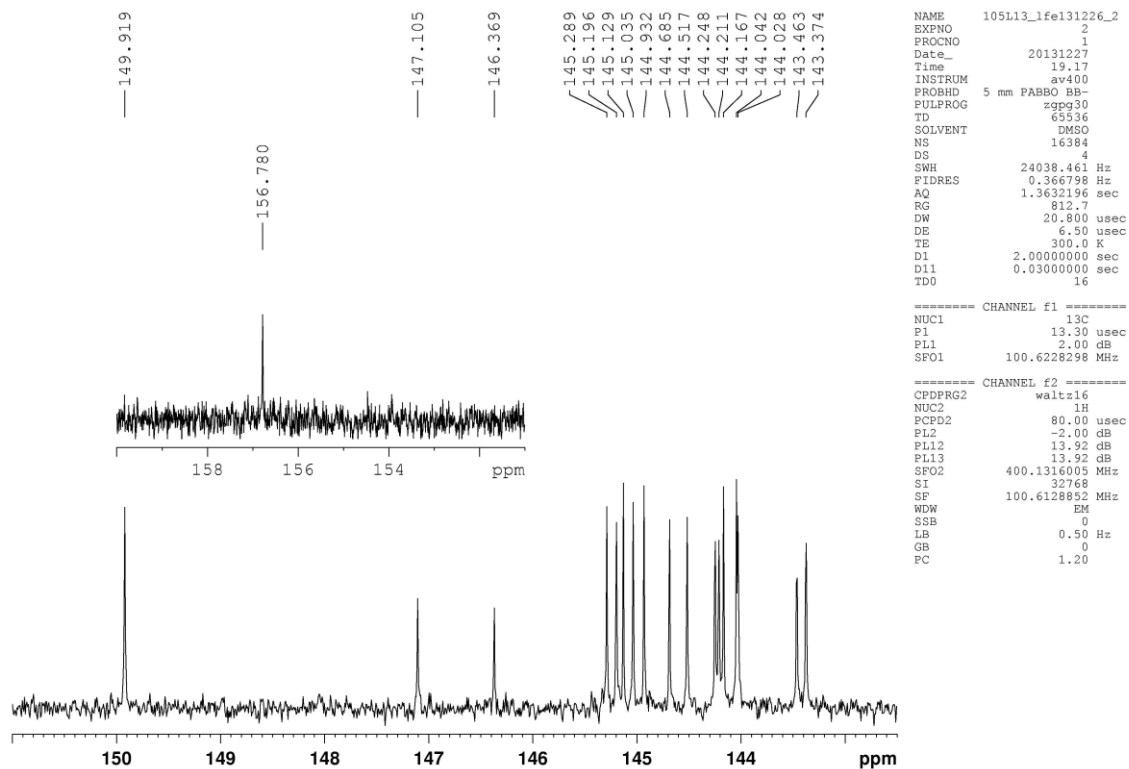

Expanded  $^{13}\text{C}$  NMR (100 MHz,  $\text{CS}_2/\text{DMSO}-d_6$ ) of compound 2g

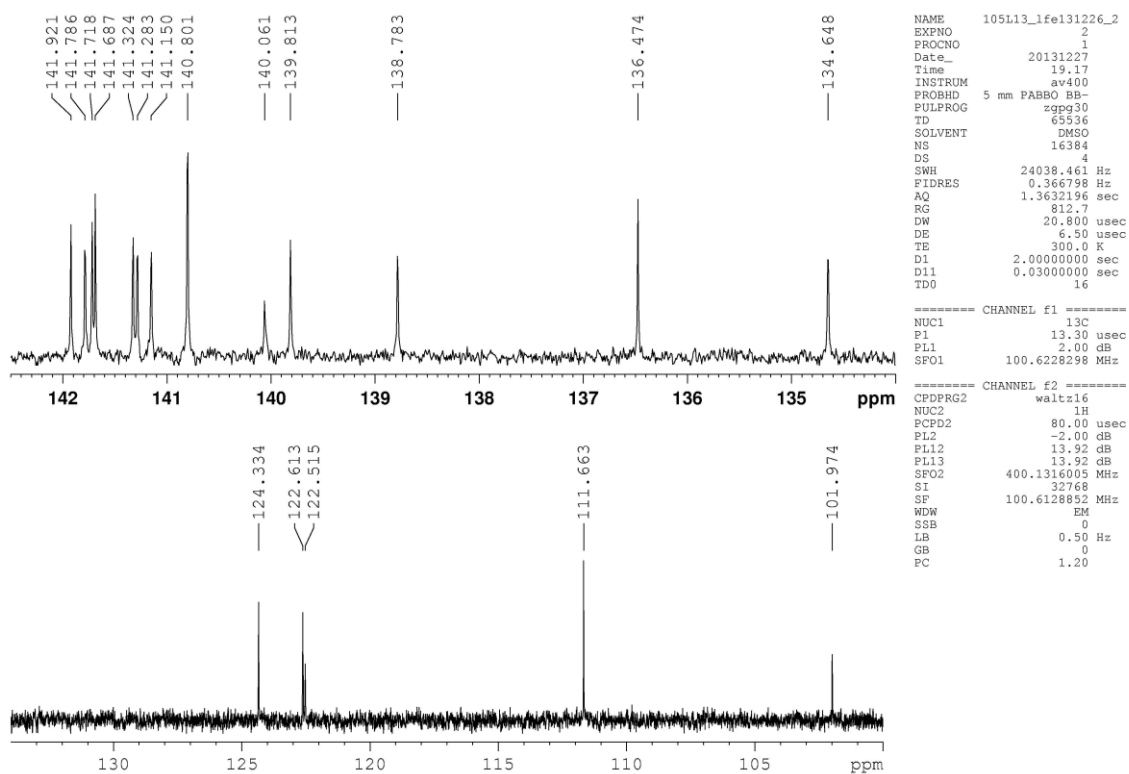

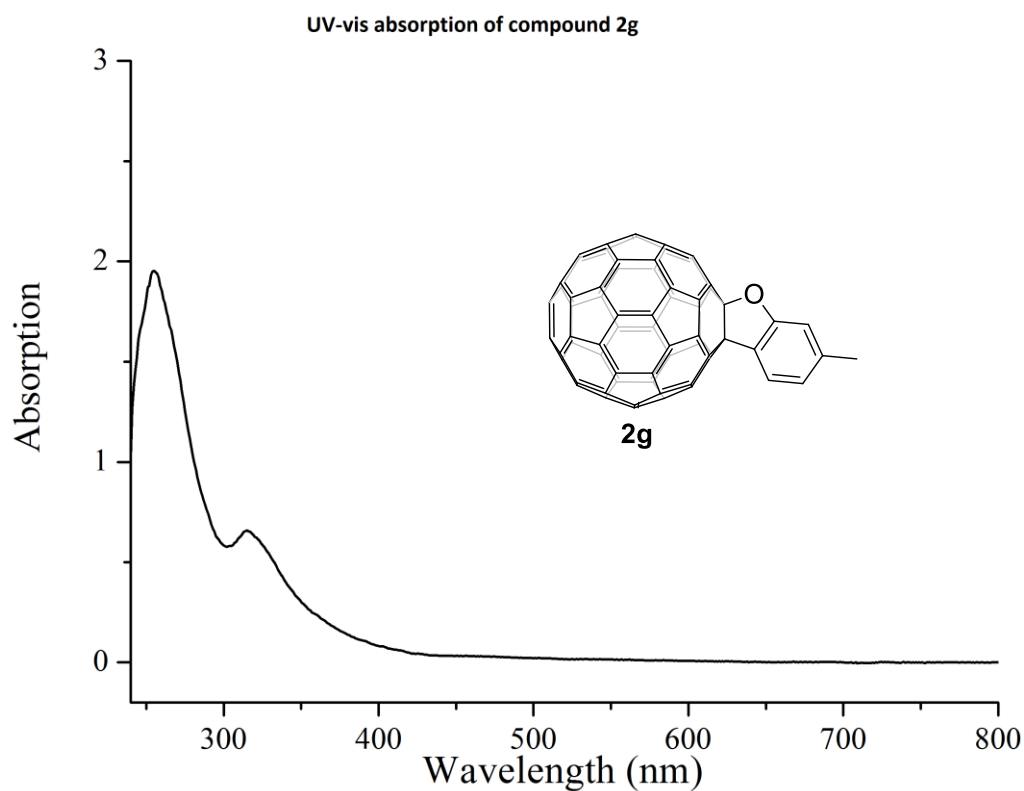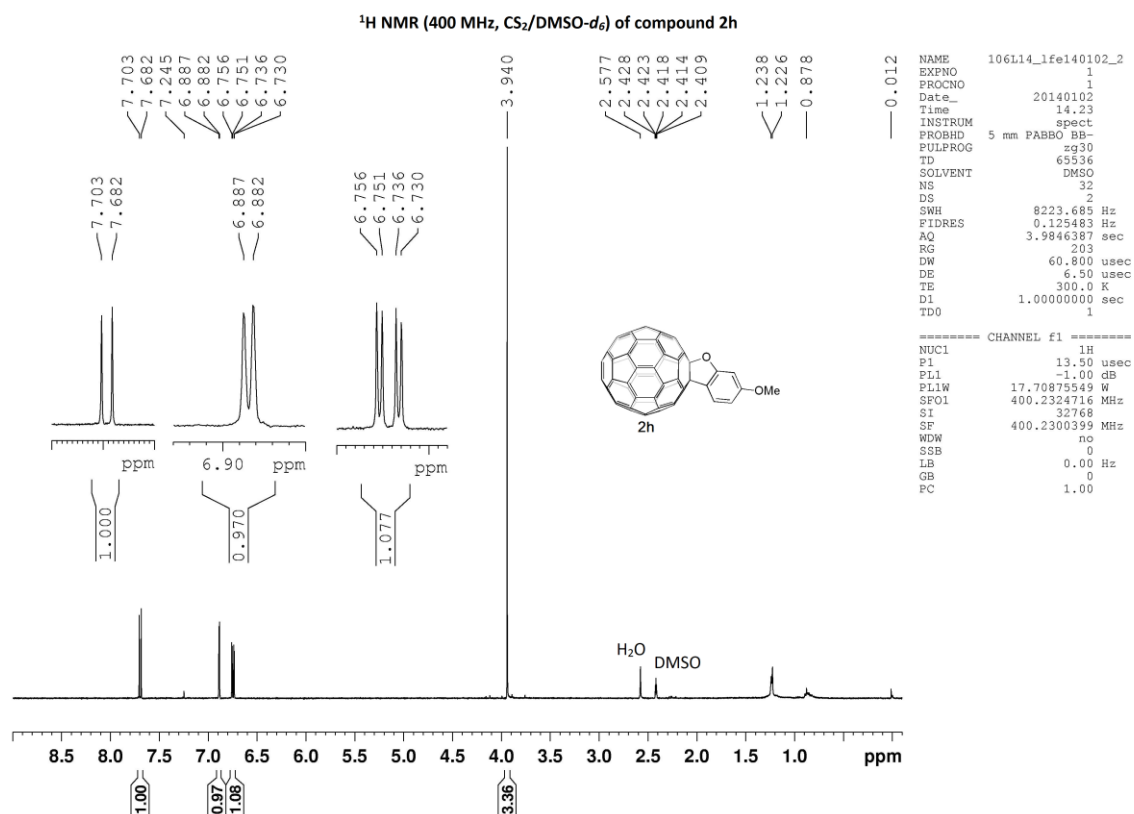

<sup>13</sup>C NMR (100 MHz, CS<sub>2</sub>/DMSO-*d*<sub>6</sub>) of compound 2h

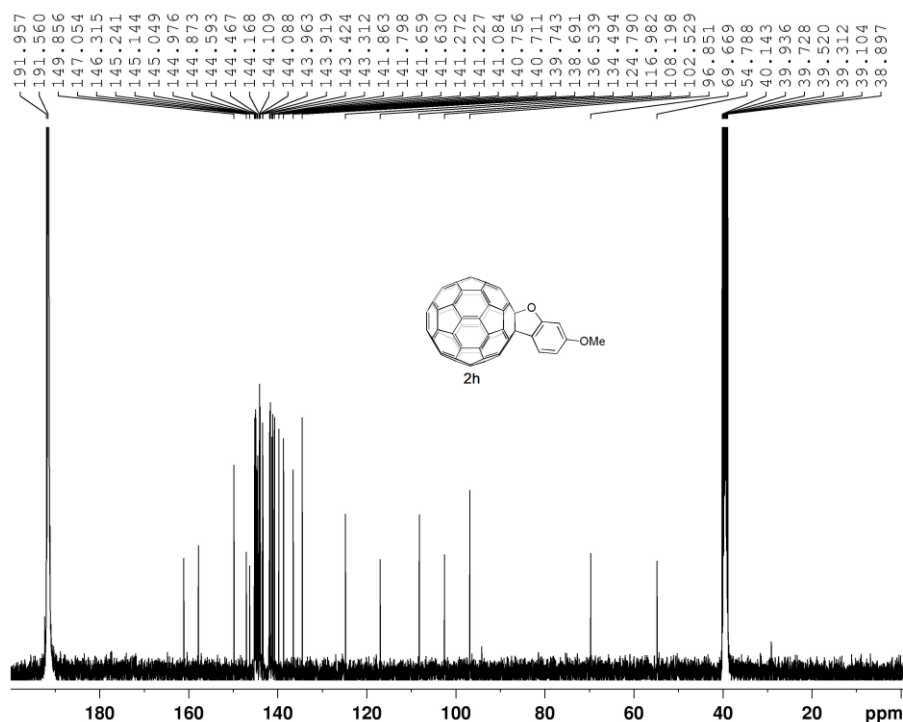

```

NAME      106L14_lfel40103_2
EXPNO     2
PROCNO     1
Date_      20140104
Time       23.32
INSTRUM    spect
PROBHD     5 mm PABBO BB-
PULPROG    zgpg30
TD         65536
SOLVENT    DMSO
NS         16384
DS         4
SWH         24038.461 Hz
FIDRES     0.366798 Hz
AQ         1.3631988 sec
RG         203
DW         20.800 usec
DE         6.50 usec
TE         300.0 K
D1         2.00000000 sec
D11        0.03000000 sec
TD0        16
  
```

```

===== CHANNEL f1 =====
NUC1       13C
P1         12.30 usec
PL1        3.00 dB
PL1W       41.92221451 W
SFO1       100.6479773 MHz
  
```

```

===== CHANNEL f2 =====
CPDPRG2    waltz16
NUC2       1H
PCPD2      90.00 usec
PL2        -1.00 dB
PL12       15.48 dB
PL13       17.00 dB
PL12W      17.70875549 W
PL12W      0.39827961 W
PL13W      0.28066486 W
SFO2       400.2316009 MHz
SI         32768
SF         100.6380364 MHz
WDW        EM
SSB        0
LB         1.00 Hz
GB         0
PC         1.00
  
```

Expanded <sup>13</sup>C NMR (100 MHz, CS<sub>2</sub>/DMSO-*d*<sub>6</sub>) of compound 2h

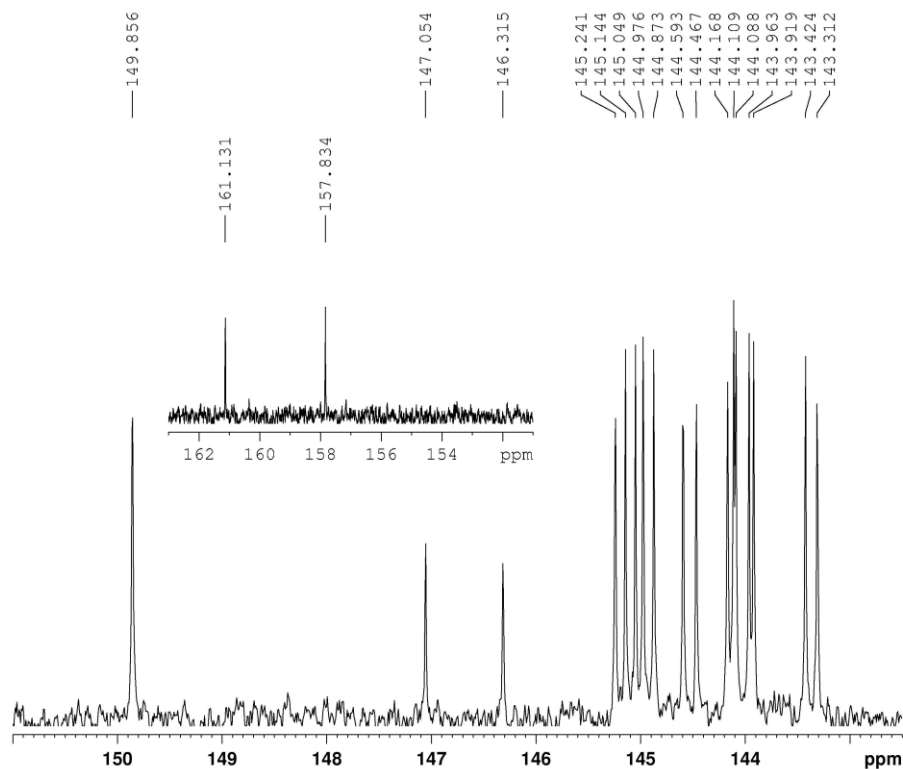

```

NAME      106L14_lfel40103_2
EXPNO     2
PROCNO     1
Date_      20140104
Time       23.32
INSTRUM    spect
PROBHD     5 mm PABBO BB-
PULPROG    zgpg30
TD         65536
SOLVENT    DMSO
NS         16384
DS         4
SWH         24038.461 Hz
FIDRES     0.366798 Hz
AQ         1.3631988 sec
RG         203
DW         20.800 usec
DE         6.50 usec
TE         300.0 K
D1         2.00000000 sec
D11        0.03000000 sec
TD0        16
  
```

```

===== CHANNEL f1 =====
NUC1       13C
P1         12.30 usec
PL1        3.00 dB
PL1W       41.92221451 W
SFO1       100.6479773 MHz
  
```

```

===== CHANNEL f2 =====
CPDPRG2    waltz16
NUC2       1H
PCPD2      90.00 usec
PL2        -1.00 dB
PL12       15.48 dB
PL13       17.00 dB
PL12W      17.70875549 W
PL12W      0.39827961 W
PL13W      0.28066486 W
SFO2       400.2316009 MHz
SI         32768
SF         100.6380364 MHz
WDW        EM
SSB        0
LB         1.00 Hz
GB         0
PC         1.00
  
```

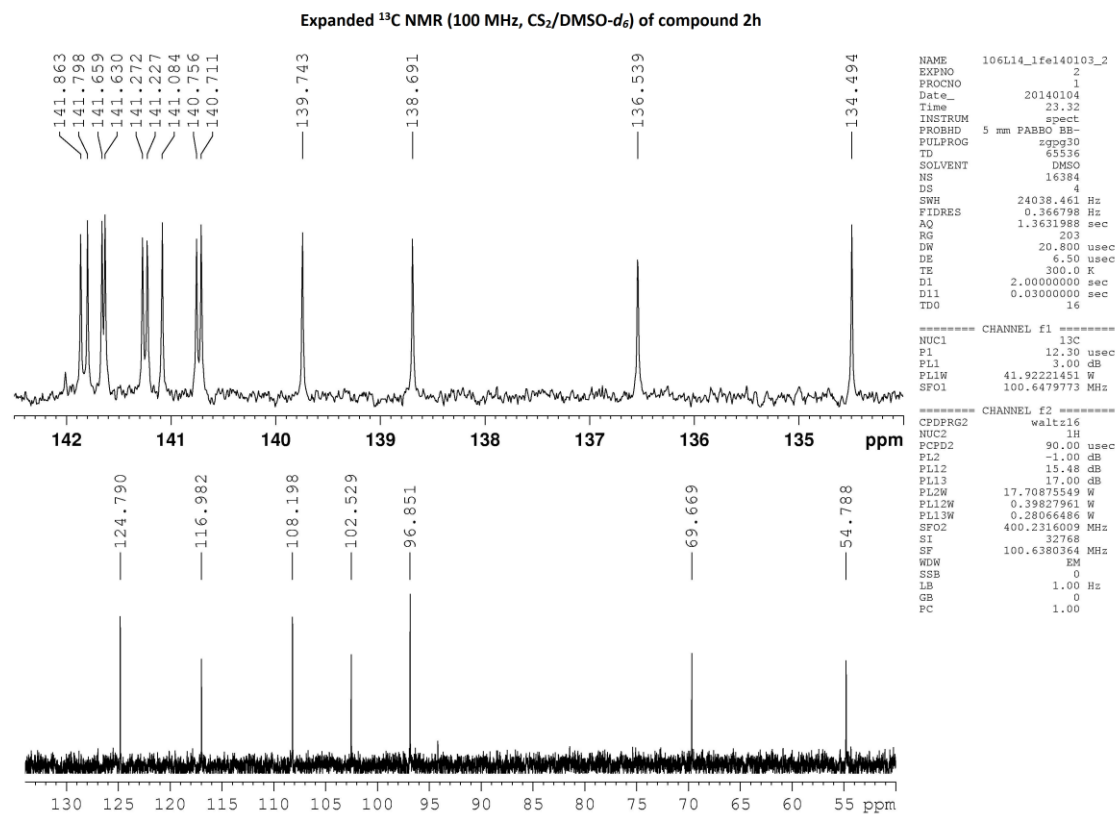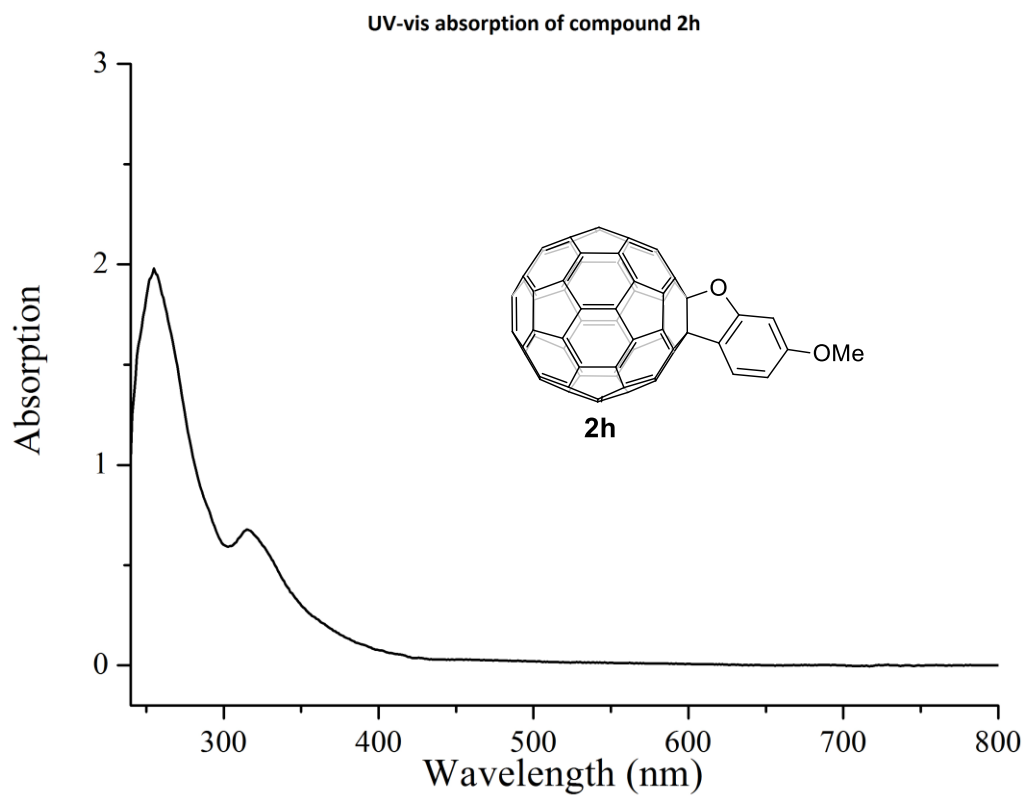

Chemical structure of compound 2i is shown on the right. The structure is a complex molecule with a central benzene ring fused to a five-membered ring, which is further fused to a six-membered ring. The molecule has several substituents, including a phenyl group and a methoxy group.

**<sup>1</sup>H NMR Data:**

| Chemical Shift (ppm)                                                                      | Integration |
|-------------------------------------------------------------------------------------------|-------------|
| 7.475, 7.454, 7.234                                                                       | 1.00        |
| 6.798, 6.777                                                                              | 1.02        |
| 4.406, 4.389, 4.373, 4.115, 4.099, 4.083                                                  | 2.02        |
| 1.991, 1.972, 1.955, 1.937, 1.919                                                         | 2.04        |
| 1.198, 1.180, 1.172, 1.161, 1.154                                                         | 4.14        |
| 2.147, 1.991, 1.972, 1.955, 1.937, 1.919, 1.428, 1.241, 1.198, 1.180, 1.172, 1.161, 1.154 | 6.14        |

151.000  
150.277  
148.257  
147.514  
146.421  
146.347  
146.229  
146.152  
146.033  
145.851  
145.639  
145.304  
145.284  
145.232  
145.188  
145.130  
144.561  
144.481  
142.979  
142.894  
142.804  
142.781  
142.438  
142.403  
142.222  
141.877  
141.807  
140.858  
139.785  
137.831  
136.723  
134.294  
120.783  
119.155  
108.460  
103.934  
77.478  
77.367  
77.160  
76.843  
75.279  
71.436  
71.008  
23.777  
23.001  
10.816  
10.736

NAME 105L13\_lfe130417  
EXPNO 2  
PROCNO 1  
Date\_ 20130417  
Time 19.37  
INSTRUM av400  
PROBHD 5 mm PABBO BB-  
PULPROG zgpg30  
TD 65536  
CDCL3  
NS 12288  
DS 4  
SWH 24038.461 Hz  
FIDRES 0.366798 Hz  
AQ 1.3632196 sec  
RG 812.7  
DW 20.800 usec  
DE 6.50 usec  
TE 299.9 K  
D1 2.00000000 sec  
D11 0.03000000 sec  
TDO 12

===== CHANNEL f1 =====  
NUC1 13C  
P1 13.40 usec  
PL1 2.00 dB  
SFO1 100.6228298 MHz

===== CHANNEL f2 =====  
CDPRG2 waltz16  
NUC2 1H  
PCPD2 80.00 usec  
PL2 -1.00 dB  
PL12 14.78 dB  
PL13 14.80 dB  
SFO2 400.1314005 MHz  
SI 32768  
SF 100.6127663 MHz  
WDW EM  
SSB 0  
LB 0.50 Hz  
GB 0  
PC 1.00

2i

Expanded  $^{13}\text{C}$  NMR (100 MHz,  $\text{CS}_2/\text{CDCl}_3$ ) of compound 2i

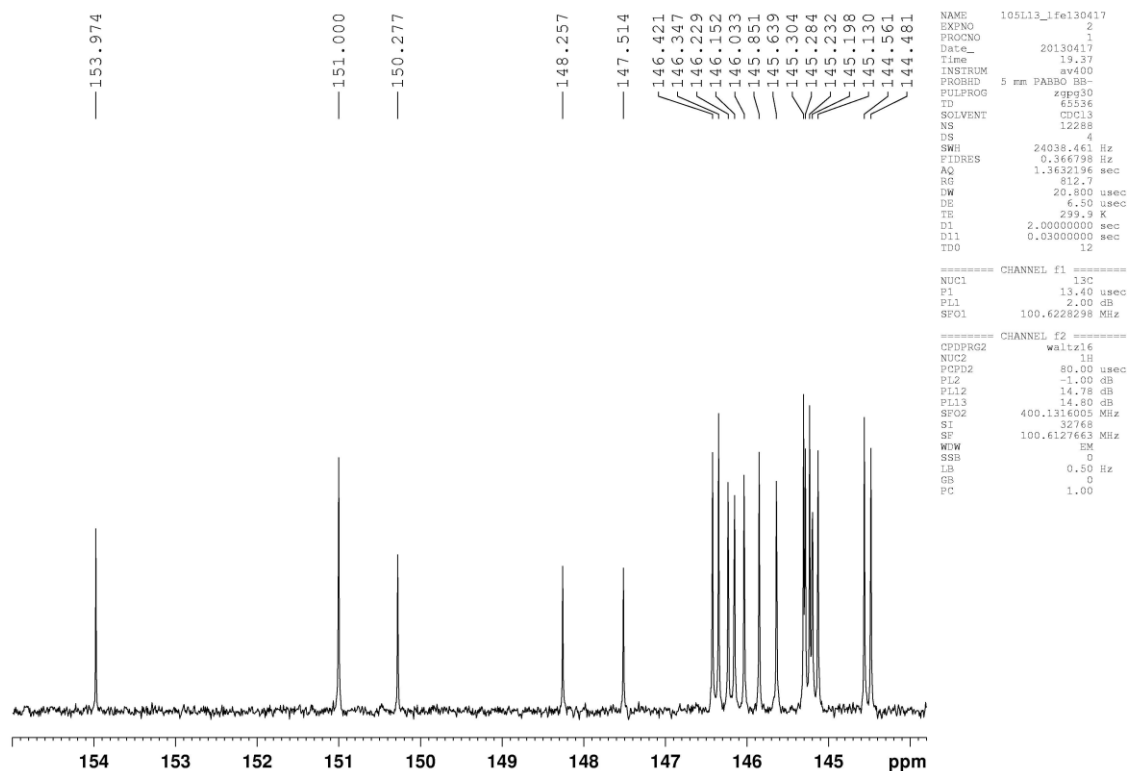

Expanded  $^{13}\text{C}$  NMR (100 MHz,  $\text{CS}_2/\text{CDCl}_3$ ) of compound 2i

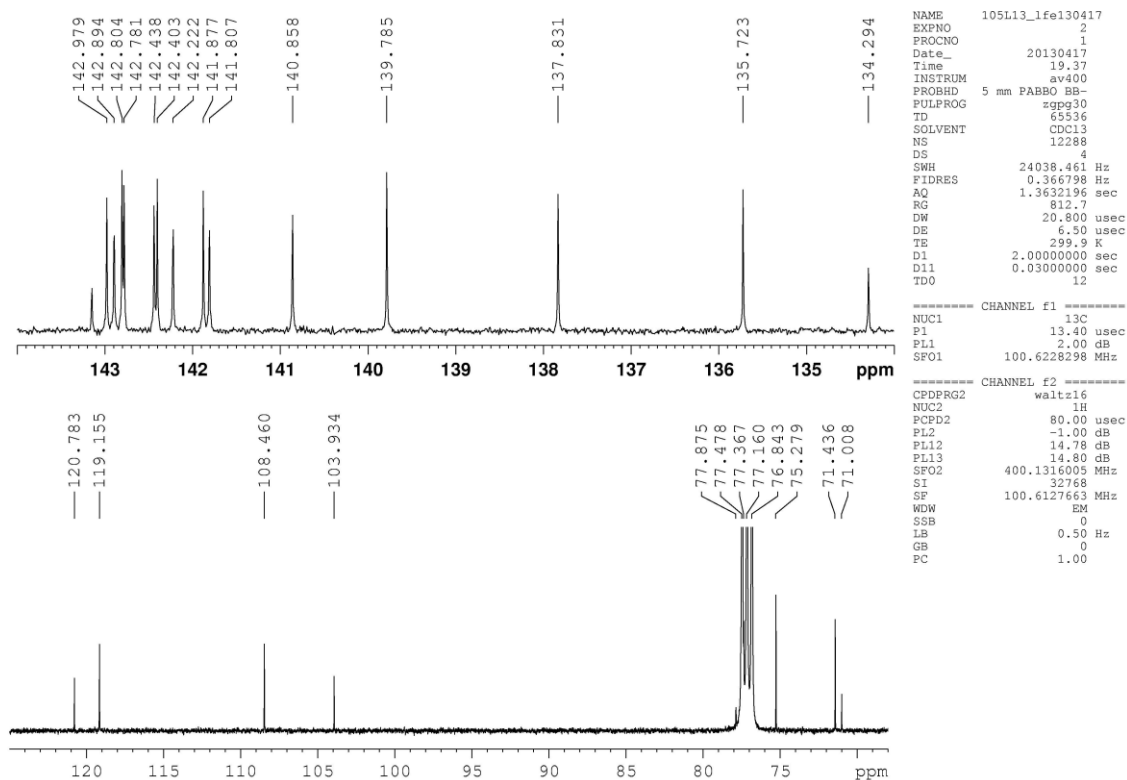

UV-vis absorption of compound 2i

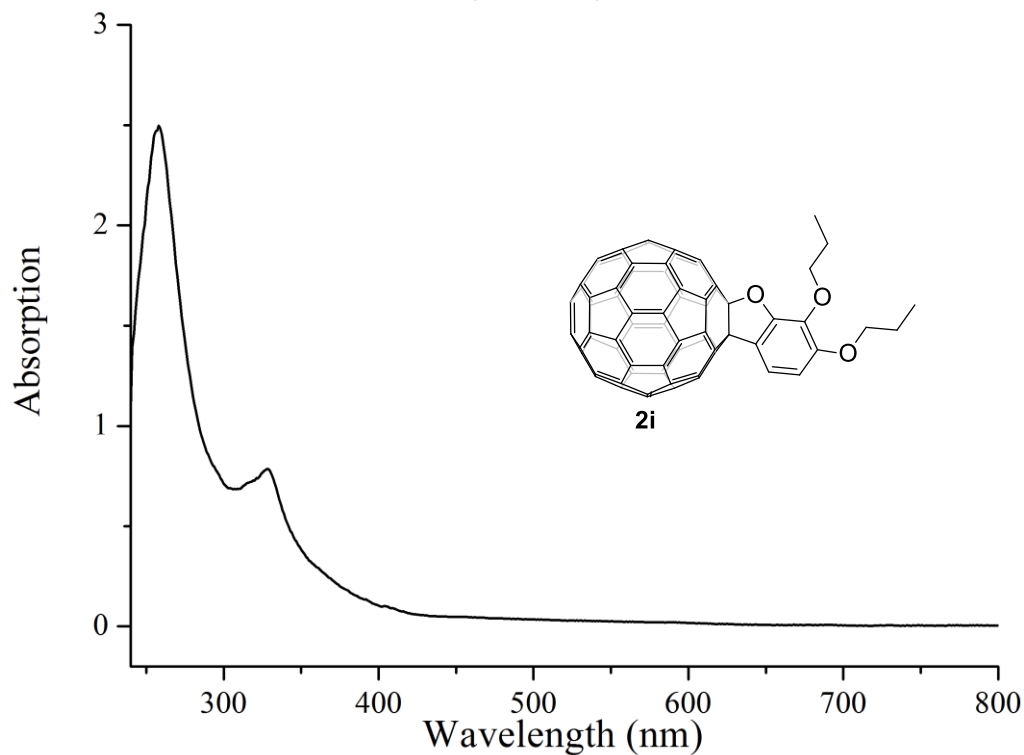

<sup>1</sup>H NMR (400 MHz, CS<sub>2</sub>/acetone-*d*<sub>6</sub>) of compound 3h

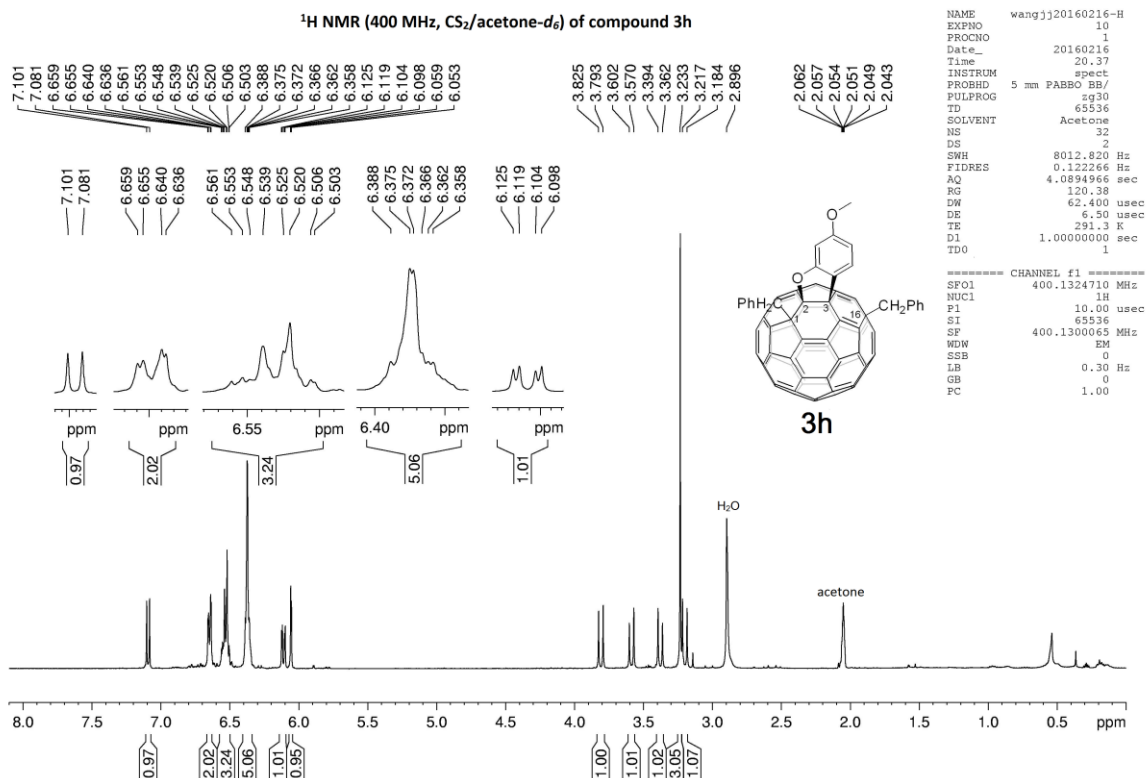

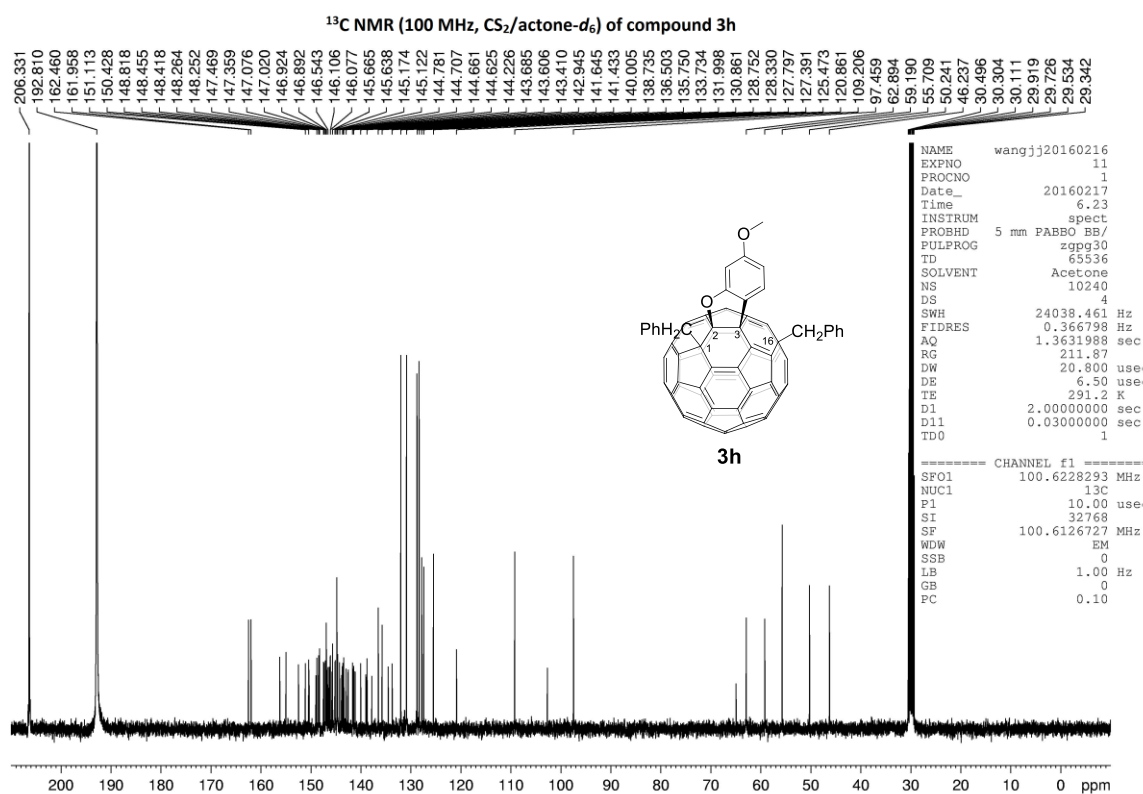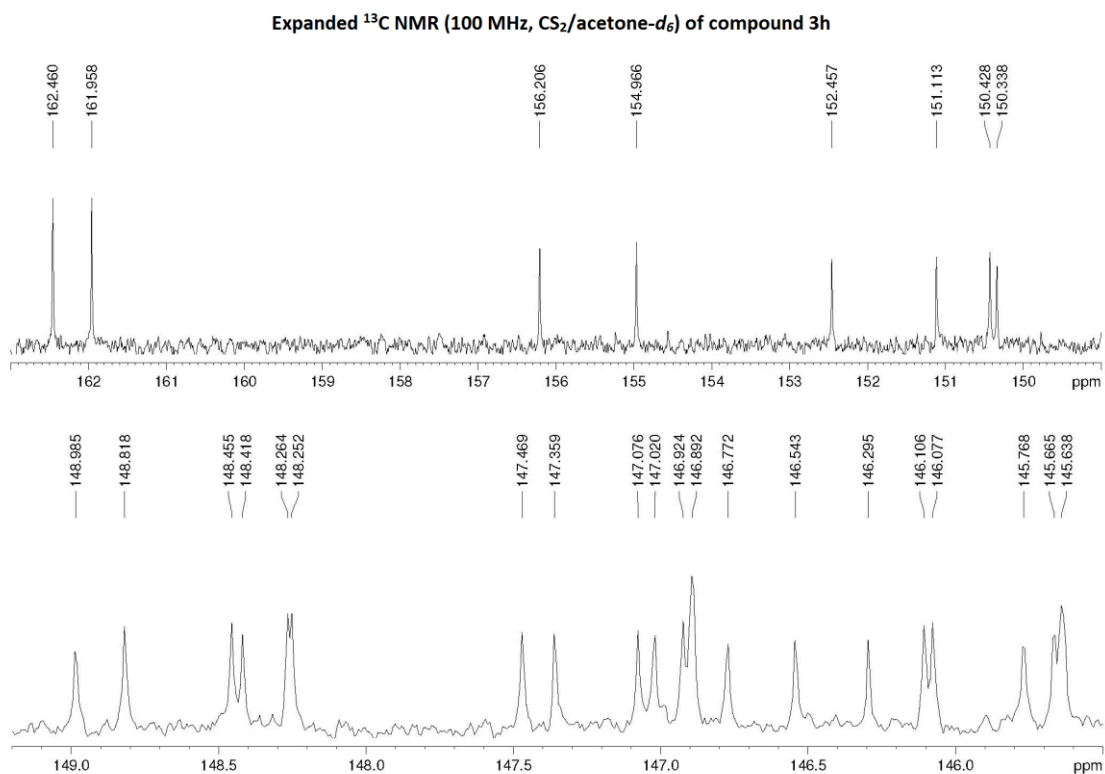

Expanded  $^{13}\text{C}$  NMR (100 MHz,  $\text{CS}_2/\text{acetone-}d_6$ ) of compound 3h

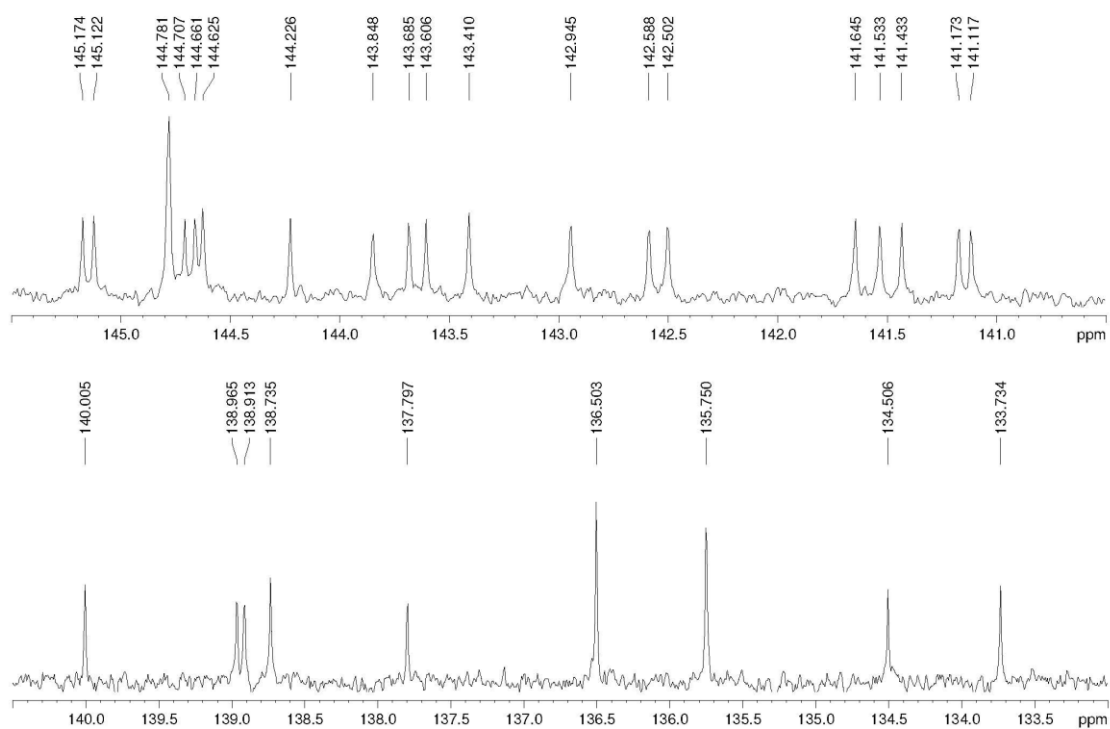

Expanded  $^{13}\text{C}$  NMR (100 MHz,  $\text{CS}_2/\text{acetone-}d_6$ ) of compound 3h

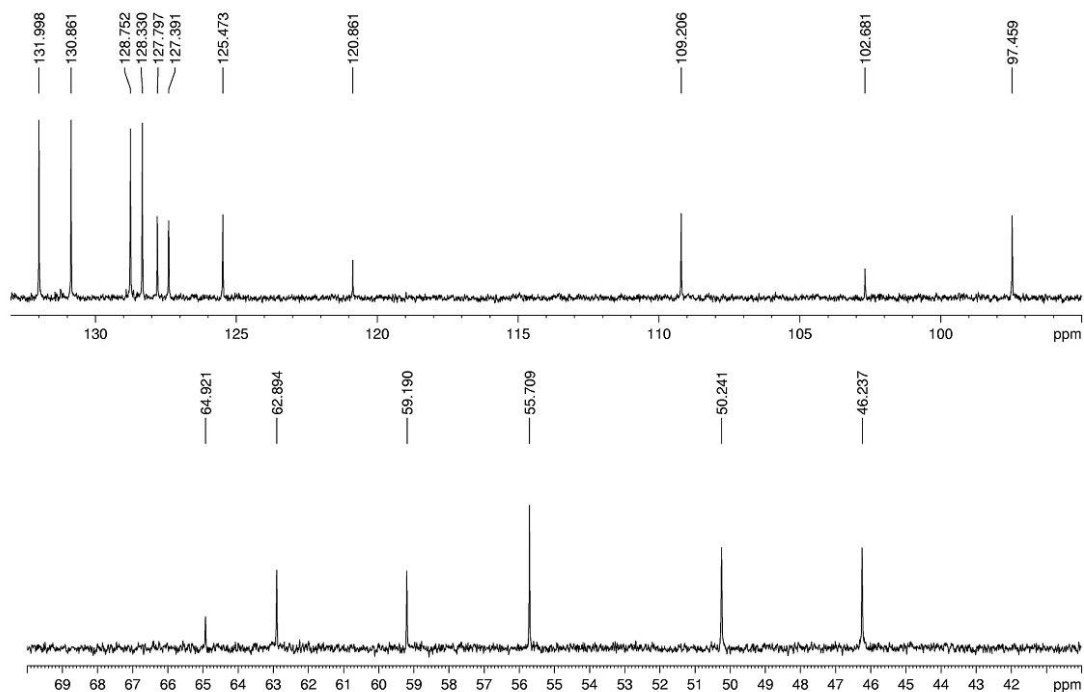

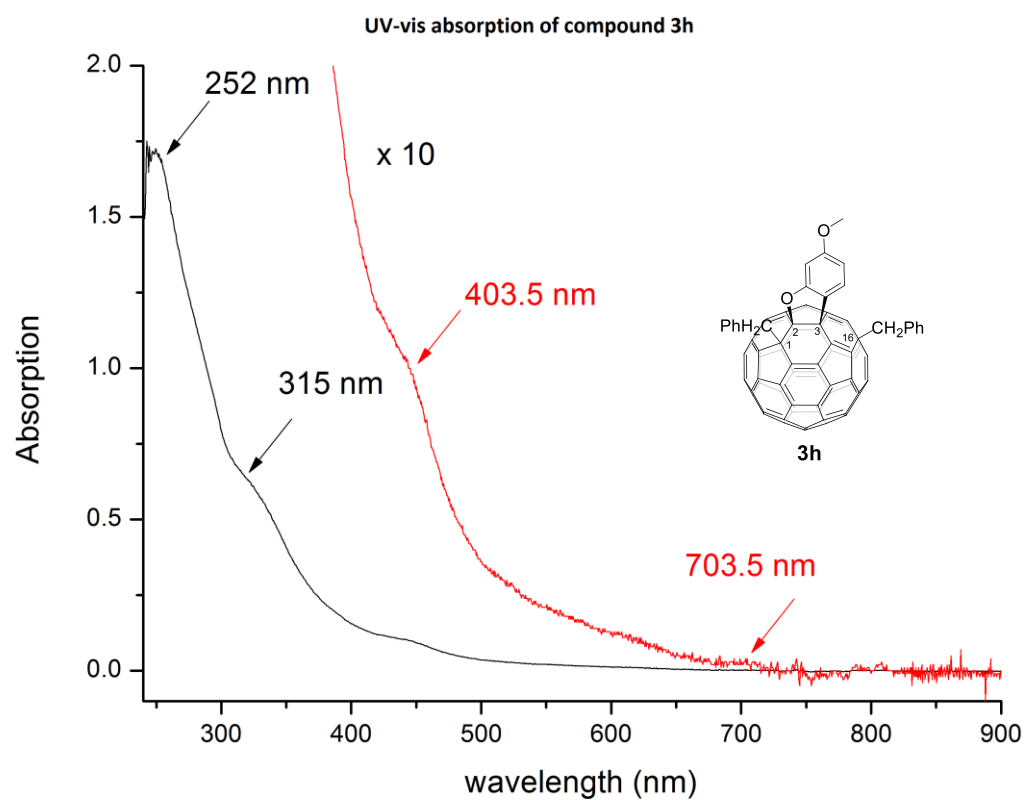

CV of **2h**

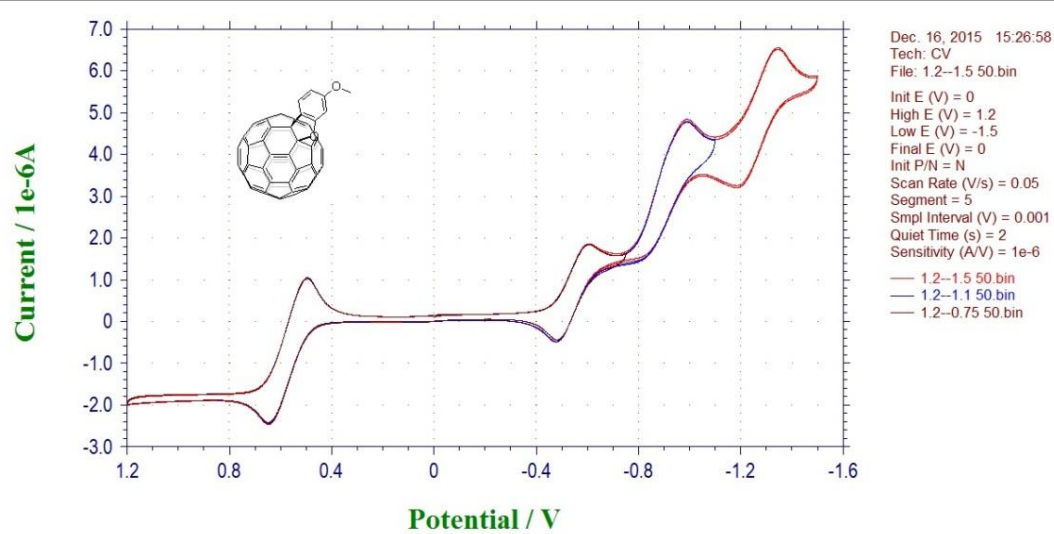

## Raman spectrum of **2a**

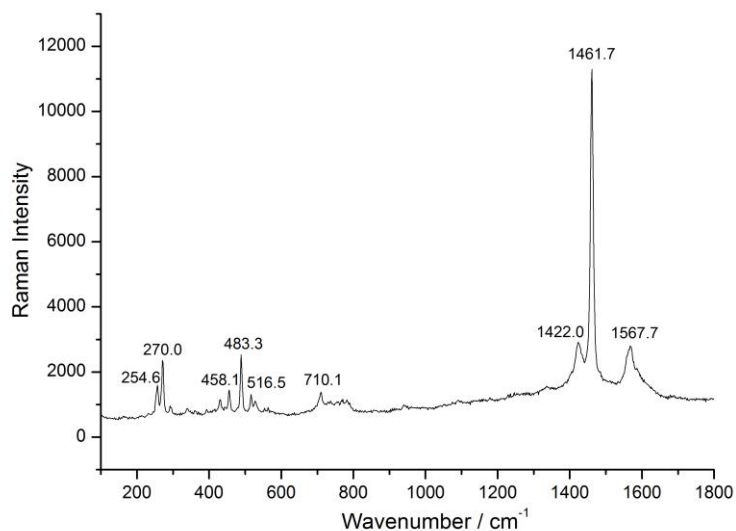

## XPS spectrum and peak table of **2a**

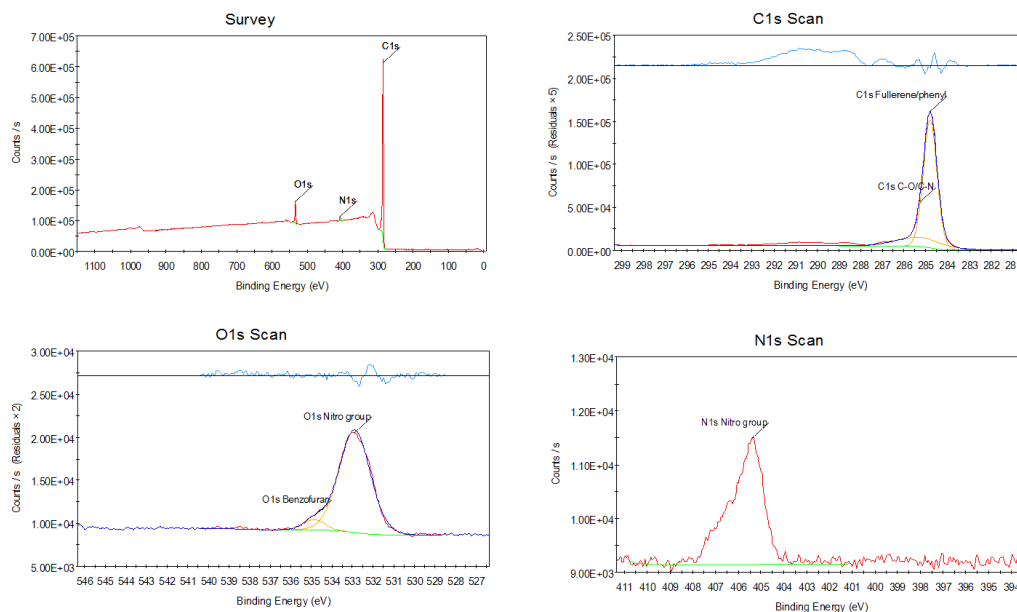

| Peak Table           |          |         |        |            |         |                 |
|----------------------|----------|---------|--------|------------|---------|-----------------|
| Name                 | Start BE | Peak BE | End BE | Height CPS | FWHM eV | Area (P) CPS.eV |
| C1s Fullerene/phenyl | 299.37   | 284.8   | 280.37 | 149649.58  | 0.73    | 117714.71       |
| C1s C–O/C–N          | 299.37   | 285.32  | 280.37 | 11103.09   | 2.4     | 28832.24        |
| N1s Nitro group      | 410.8    | 405.4   | 401.15 | 2292.96    | 1.62    | 4356.84         |
| O1s Nitro group      | 540.4    | 532.89  | 528.55 | 11921.59   | 1.78    | 22943.62        |
| O1s Benzofuran       | 540.4    | 534.85  | 528.55 | 1233.78    | 1.17    | 1566.9          |
